# Supplementary material for: Assembly of MnIII ions into di-, tetra-, deca-nuclear coordination complexes, zero- to three-dimensional molecular frameworks: molecular spin flop to and short-range bulk magnetic spin flop ordering
Source: Royal Society of Chemistry journal article supplement (doi:10.1039/d3ce00967j), 2023-11-16
Supplement: d3ce00967j1.pdf [file d3ce00967j1.pdf]

## Supporting Information

### **Assembly of Mn<sup>III</sup> ions into Di-, Tetra-, Deca-nuclear Coordination Complexes, Zero- to Three-Dimensional Molecular Framework: Molecular Spin Flop to and short Range Bulk Magnetic Spin Flop Ordering**

Jayasree Kumar,<sup>a</sup> Ibtesham Tarannum,<sup>b</sup> Yan-Zhen Zheng,<sup>c\*</sup> Saurabh Kumar Singh,<sup>b\*</sup> Kartik Chandra Mondal<sup>a\*</sup>

<sup>a</sup>Department of Chemistry, Indian Institute of Technology Madras, Chennai, India

<sup>b</sup>Department of Chemistry, Indian Institute of Technology Hyderabad, Kandi, Sangareddy, Telangana, India-502285

<sup>c</sup>Frontier Institute of Science and Technology, Xi'an Jiaotong University, 99 Yanxiang Road, Xi'an, Shaanxi 710054, P. R. China.

#### **Contents:**

1. Crystallographic information
2. BVS calculations
3. Powder X-ray Diffraction studies
4. Infrared spectra
5. UV/Vis measurements
6. Thermogravimetric analysis (TGA)
7. Magnetic Studies
8. Theoretical calculations
9. Synthesis of ligand H<sub>3</sub>L and discussion
10. Powder XRD pattern of pyrolyzed products (manganese-oxide)
11. References

#### **1. Crystallographic Information**

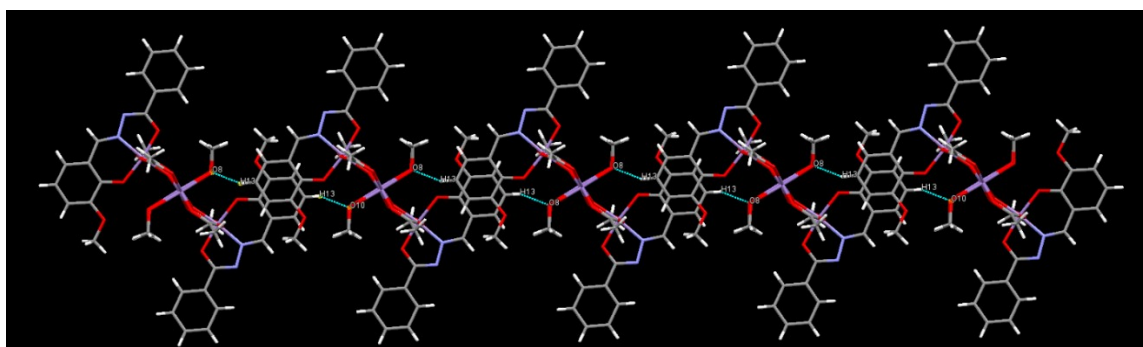

**Figure S1.** H-bonding interactions (O8---H13-C) in  $\text{Mn}^{\text{III}}_4$  of  $[\text{Mn}^{\text{III}}_4(\mu_3\text{-O})_2(\text{L}^1)_2(\text{OAc})_4(\text{HOMe})_4]$  (**1**).

**Table S1.** Crystal structural refinement data parameters of complexes **1**, **2**, **3** and **4**.

| Complex                                                              | <b>1</b>                                                       | <b>2</b>                                                    | <b>3</b>                                                    | <b>4</b>                                                                            |
|----------------------------------------------------------------------|----------------------------------------------------------------|-------------------------------------------------------------|-------------------------------------------------------------|-------------------------------------------------------------------------------------|
| <b>Chemical formula</b>                                              | $\text{C}_{42}\text{H}_{48}\text{Mn}_4\text{N}_4\text{O}_{20}$ | $\text{C}_{30}\text{H}_{34}\text{Mn}_2\text{N}_6\text{O}_8$ | $\text{C}_{30}\text{H}_{28}\text{Mn}_2\text{N}_6\text{O}_8$ | $\text{C}_{136}\text{H}_{118}\text{Mn}_{10}\text{N}_{24}\text{O}_{42}\text{S}_{10}$ |
| <b>Formula weight</b>                                                | 1148.60                                                        | 716.51                                                      | 710.46                                                      | 3081.19                                                                             |
| <b>CCDC Number</b>                                                   | 1860848                                                        | 1860849                                                     | 1860850                                                     | 2180490                                                                             |
| <b>Crystal size (mm)</b>                                             | 0.250 x 0.220 x 0.100                                          | 0.150 x 0.100 x 0.100                                       | 0.200 x 0.150 x 0.150                                       | 0.11 × 0.34 × 0.11                                                                  |
| <b>Crystal system</b>                                                | Triclinic                                                      | Triclinic                                                   | Triclinic                                                   | Triclinic                                                                           |
| <b>Space group</b>                                                   | $P\bar{1}$                                                     | $P\bar{1}$                                                  | $P\bar{1}$                                                  | $P\bar{1}$                                                                          |
| <b><i>a</i> (Å)</b>                                                  | 10.5827(6)                                                     | 7.8214(5)                                                   | 10.063(12)                                                  | 9.888 (4)                                                                           |
| <b><i>b</i> (Å)</b>                                                  | 11.1323(7)                                                     | 9.9952(6)                                                   | 12.143(15)                                                  | 20.717 (9)                                                                          |
| <b><i>c</i> (Å)</b>                                                  | 12.6983(8)                                                     | 10.4841(7)                                                  | 15.195(17)                                                  | 21.011 (9)                                                                          |
| <b><math>\alpha</math> (deg)</b>                                     | 104.061(3)                                                     | 94.868(2)                                                   | 68.52(4)                                                    | 71.075 (7)                                                                          |
| <b><math>\beta</math> (deg)</b>                                      | 113.978(3)                                                     | 105.897(2)                                                  | 73.73(4)                                                    | 77.324 (8)                                                                          |
| <b><math>\gamma</math> (deg)</b>                                     | 90.275(3)                                                      | 94.543(2)                                                   | 71.10(6)                                                    | 80.532 (7)                                                                          |
| <b><i>V</i> (Å<sup>3</sup>)</b>                                      | 1316.85(14)                                                    | 780.92(9)                                                   | 1607(3)                                                     | 3952 (3)                                                                            |
| <b><i>Z</i></b>                                                      | 1                                                              | 1                                                           | 2                                                           | 1                                                                                   |
| <b><i>T</i> (K)</b>                                                  | 200(2)                                                         | 200(2)                                                      | 200(2)                                                      | 100(2)                                                                              |
| <b><math>\lambda</math> (Å)</b>                                      | 0.71073                                                        | 0.71073                                                     | 0.71073                                                     | 0.71073                                                                             |
| <b><i>D</i><sub>calc</sub> (g cm<sup>-3</sup>)</b>                   | 1.448                                                          | 1.524                                                       | 1.468                                                       | 1.627                                                                               |
| <b><math>\mu</math> (mm<sup>-1</sup>)</b>                            | 1.012                                                          | 0.869                                                       | 0.844                                                       | 0.99                                                                                |
| <b><i>R</i><sub>int</sub></b>                                        | 0.0575                                                         | 0.0670                                                      | 0.0560                                                      | 0.047                                                                               |
| <b><i>R</i><sub>1</sub> [<i>I</i> &gt; 2σ(<i>I</i>)]<sup>a</sup></b> | 0.0512                                                         | 0.0472                                                      | 0.0684                                                      | 0.092                                                                               |
| <b>w<i>R</i><sub>2</sub> (all data)<sup>b</sup></b>                  | 0.1236                                                         | 0.1252                                                      | 0.1855                                                      | 0.294                                                                               |
| <b>Total reflections</b>                                             | 10286                                                          | 23839                                                       | 53693                                                       | 41097                                                                               |
| <b>Independent reflections</b>                                       | 4190                                                           | 2742                                                        | 7649                                                        | 1806                                                                                |
| <b>Reflections ; <i>I</i> &gt; 2σ(<i>I</i>)</b>                      | 5274                                                           | 12618                                                       | 5494                                                        | 15457                                                                               |
| <b><math>\Delta\rho_{\text{max}}</math> (e Å<sup>-3</sup>)</b>       | + 1.733                                                        | + 1.974 e Å <sup>-3</sup>                                   | 1.549                                                       | 3.54                                                                                |
| <b><math>\Delta\rho_{\text{min}}</math> (e Å<sup>-3</sup>)</b>       | −0.469                                                         | −1.134                                                      | −1.284                                                      | −1.44                                                                               |

## Supporting Information

|             |       |       |        |      |
|-------------|-------|-------|--------|------|
| <b>GooF</b> | 0.820 | 1.166 | 1.1068 | 1.11 |
|-------------|-------|-------|--------|------|

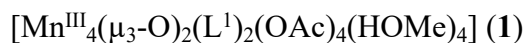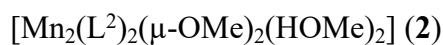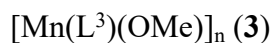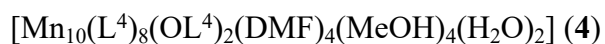**Selected bond lengths and bond angles****Table S2.** Selected bond lengths [ $\text{\AA}$ ] and angles [ $^\circ$ ] of  $[\text{Mn}^{\text{III}}_4(\mu_3\text{-O})_2(\text{L}^1)_2(\text{OAc})_4(\text{HOMe})_4]$  (1).

|                     |            |
|---------------------|------------|
| Mn(1)-O(6)          | 1.893(3)   |
| Mn(1)-O(1)          | 1.927(3)   |
| Mn(1)-O(2)          | 1.925(3)   |
| Mn(1)-N(1)          | 1.973(4)   |
| Mn(1)-O(4)          | 2.172(4)   |
| Mn(1)-O(3)          | 2.178(4)   |
| Mn(2)-O(6)#1        | 1.891(3)   |
| Mn(2)-O(6)          | 1.897(3)   |
| Mn(2)-O(9)#1        | 1.957(3)   |
| Mn(2)-O(7)          | 1.959(4)   |
| Mn(2)-O(8)          | 2.235(3)   |
| Mn(2)-O(10)         | 2.257(3)   |
| Mn(2)-Mn(2)#1       | 2.8815(15) |
| O(6)-Mn(1)-O(1)     | 94.91(13)  |
| O(6)-Mn(1)-O(2)     | 93.39(13)  |
| O(1)-Mn(1)-O(2)     | 171.69(14) |
| O(6)-Mn(1)-N(1)     | 173.01(14) |
| O(1)-Mn(1)-N(1)     | 92.05(14)  |
| O(2)-Mn(1)-N(1)     | 79.65(14)  |
| O(6)-Mn(1)-O(4)     | 95.23(13)  |
| O(1)-Mn(1)-O(4)     | 87.43(14)  |
| O(2)-Mn(1)-O(4)     | 91.65(14)  |
| N(1)-Mn(1)-O(4)     | 84.43(15)  |
| O(6)-Mn(1)-O(3)     | 95.14(13)  |
| O(1)-Mn(1)-O(3)     | 86.91(13)  |
| O(2)-Mn(1)-O(3)     | 92.52(14)  |
| N(1)-Mn(1)-O(3)     | 85.85(15)  |
| O(4)-Mn(1)-O(3)     | 168.57(13) |
| O(6)#1-Mn(2)-O(6)   | 80.95(14)  |
| O(6)#1-Mn(2)-O(9)#1 | 97.55(15)  |
| O(6)-Mn(2)-O(9)#1   | 174.44(14) |
| O(6)#1-Mn(2)-O(7)   | 173.01(15) |
| O(6)-Mn(2)-O(7)     | 97.17(15)  |

## Supporting Information

|                    |            |
|--------------------|------------|
| O(9)#1-Mn(2)-O(7)  | 84.94(16)  |
| O(6)#1-Mn(2)-O(8)  | 96.03(14)  |
| O(6)-Mn(2)-O(8)    | 90.58(12)  |
| O(9)#1-Mn(2)-O(8)  | 84.24(14)  |
| O(7)-Mn(2)-O(8)    | 90.72(15)  |
| O(6)#1-Mn(2)-O(10) | 89.02(13)  |
| O(6)-Mn(2)-O(10)   | 97.45(13)  |
| O(9)#1-Mn(2)-O(10) | 87.86(14)  |
| O(7)-Mn(2)-O(10)   | 84.54(14)  |
| O(8)-Mn(2)-O(10)   | 171.12(13) |

Symmetry transformations used to generate equivalent atoms:

#1 -x+1,-y+2,-z+1

**Table S3.1.** Selected bond lengths [Å] and angles [°] of [Mn<sub>2</sub>(L<sup>2</sup>)<sub>2</sub>(μ-OMe)<sub>2</sub>(HOMe)<sub>2</sub>] (**2**).

|                   |            |
|-------------------|------------|
| Mn(1)-O(1)        | 1.881(3)   |
| Mn(1)-O(3)        | 1.896(3)   |
| Mn(1)-O(2)        | 1.927(2)   |
| Mn(1)-N(1)        | 1.987(3)   |
| Mn(1)-O(3)#1      | 2.242(3)   |
| Mn(1)-O(4)        | 2.244(3)   |
| O(1)-Mn(1)-O(3)   | 96.45(11)  |
| O(1)-Mn(1)-O(2)   | 168.88(12) |
| O(3)-Mn(1)-O(2)   | 93.49(11)  |
| O(1)-Mn(1)-N(1)   | 91.06(12)  |
| O(3)-Mn(1)-N(1)   | 170.26(12) |
| O(2)-Mn(1)-N(1)   | 79.64(12)  |
| O(1)-Mn(1)-O(3)#1 | 97.39(11)  |
| O(3)-Mn(1)-O(3)#1 | 80.79(10)  |
| O(2)-Mn(1)-O(3)#1 | 89.10(10)  |
| N(1)-Mn(1)-O(3)#1 | 92.13(11)  |
| O(1)-Mn(1)-O(4)   | 85.54(11)  |
| O(3)-Mn(1)-O(4)   | 97.78(11)  |
| O(2)-Mn(1)-O(4)   | 88.19(11)  |
| N(1)-Mn(1)-O(4)   | 88.96(12)  |
| O(3)#1-Mn(1)-O(4) | 176.86(9)  |
| N(2)-N(1)-Mn(1)   | 115.4(2)   |

Symmetry transformations used to generate equivalent atoms:

#1 -x+1,-y+1,-z+1

**Table S3.2.** Hydrogen bonding interactions of **2**.

| D-H...A             | d(D-H) | d(H...A) | d(D...A) | <(DHA) |
|---------------------|--------|----------|----------|--------|
| O(3)-H(3A)...N(1)#1 | 0.84   | 2.34     | 3.050(4) | 143.1  |
| O(4)-H(4A)...N(3)#2 | 0.84   | 1.91     | 2.746(4) | 176.5  |

#1 -x+1,-y+1,-z+1    #2 x,y+1,z

**Table S4.** Selected bond lengths [Å] and angles [°] of [Mn(L<sup>3</sup>)(OMe)]<sub>n</sub> (**3**).

|                     |            |
|---------------------|------------|
| Mn(1)-O(1)          | 1.887(4)   |
| Mn(1)-O(3)          | 1.890(4)   |
| Mn(1)-N(3)          | 1.974(4)   |
| Mn(1)-O(2)          | 1.978(4)   |
| Mn(1)-O(3)#1        | 2.218(4)   |
| Mn(1)-N(1)          | 2.313(5)   |
| Mn(2)-O(5)          | 1.887(4)   |
| Mn(2)-O(6)          | 1.895(4)   |
| Mn(2)-O(4)          | 1.946(4)   |
| Mn(2)-N(6)          | 1.984(4)   |
| Mn(2)-O(6)#2        | 2.229(4)   |
| Mn(2)-N(2)#3        | 2.383(5)   |
| O(1)-Mn(1)-O(3)     | 94.16(17)  |
| O(1)-Mn(1)-N(3)     | 89.99(18)  |
| O(3)-Mn(1)-N(3)     | 174.93(16) |
| O(1)-Mn(1)-O(2)     | 168.30(14) |
| O(3)-Mn(1)-O(2)     | 96.74(16)  |
| N(3)-Mn(1)-O(2)     | 79.35(17)  |
| O(1)-Mn(1)-O(3)#1   | 100.04(16) |
| O(3)-Mn(1)-O(3)#1   | 81.79(16)  |
| N(3)-Mn(1)-O(3)#1   | 94.63(16)  |
| O(2)-Mn(1)-O(3)#1   | 85.75(16)  |
| O(1)-Mn(1)-N(1)     | 91.55(17)  |
| O(3)-Mn(1)-N(1)     | 90.59(16)  |
| N(3)-Mn(1)-N(1)     | 92.21(17)  |
| O(2)-Mn(1)-N(1)     | 84.11(17)  |
| O(3)#1-Mn(1)-N(1)   | 166.52(13) |
| O(5)-Mn(2)-O(6)     | 96.79(17)  |
| O(5)-Mn(2)-O(4)     | 166.20(15) |
| O(6)-Mn(2)-O(4)     | 94.92(16)  |
| O(5)-Mn(2)-N(6)     | 90.22(18)  |
| O(6)-Mn(2)-N(6)     | 169.02(15) |
| O(4)-Mn(2)-N(6)     | 79.36(16)  |
| O(5)-Mn(2)-O(6)#2   | 96.01(16)  |
| O(6)-Mn(2)-O(6)#2   | 80.61(16)  |
| O(4)-Mn(2)-O(6)#2   | 93.09(15)  |
| N(6)-Mn(2)-O(6)#2   | 90.28(16)  |
| O(5)-Mn(2)-N(2)#3   | 86.71(17)  |
| O(6)-Mn(2)-N(2)#3   | 94.66(16)  |
| O(4)-Mn(2)-N(2)#3   | 85.07(16)  |
| N(6)-Mn(2)-N(2)#3   | 94.17(17)  |
| O(6)#2-Mn(2)-N(2)#3 | 174.78(13) |

## Supporting Information

Symmetry transformations used to generate equivalent atoms:

#1 -x+1,-y+1,-z+2 #2 -x,-y+2,-z+1 #3 -x+1,-y+1,-z+1

**Table S5.** Selected bond lengths (Å) and bond angles (°) of [Mn<sub>10</sub>(L<sup>4</sup>)<sub>8</sub>(OL<sup>4</sup>)<sub>2</sub>(DMF)<sub>4</sub>(MeOH)<sub>4</sub>(H<sub>2</sub>O)<sub>2</sub>] (4).

|             |             |            |             |             |             |
|-------------|-------------|------------|-------------|-------------|-------------|
| Mn1—O6      | 1.872 (4)   | Mn2—O24    | 1.839 (4)   | Mn3—O21     | 1.872 (4)   |
| Mn1—O8      | 1.930 (4)   | Mn2—O4     | 1.904 (4)   | Mn3—O7      | 1.910 (4)   |
| Mn1—N3      | 1.950 (5)   | Mn2—N7     | 1.950 (5)   | Mn3—N5      | 1.938 (5)   |
| Mn1—O3      | 1.963 (4)   | Mn2—O5     | 1.954 (4)   | Mn3—O2      | 1.940 (4)   |
| Mn1—O10     | 2.250 (4)   | Mn2—O15    | 2.251 (5)   | Mn3—O9      | 2.286 (5)   |
| Mn1—N2      | 2.320 (5)   | Mn2—N4     | 2.367 (5)   | Mn3—N8      | 2.345 (5)   |
| Mn4—O16     | 1.842 (6)   | Mn5—O13    | 1.846 (5)   | Mn5—N1      | 1.953 (5)   |
| Mn4—O19     | 1.913 (7)   | Mn5—O11    | 1.933 (5)   | Mn5—O14     | 1.968 (5)   |
| Mn4—N9      | 1.940 (6)   | Mn5—O17    | 2.231 (6)   | Mn5—N10     | 2.316 (6)   |
| Mn4—O12     | 1.952 (5)   | Mn4—O18    | 2.241 (7)   | Mn4—N6      | 2.355 (5)   |
| O6—Mn1—O8   | 170.22 (18) | O6—Mn1—O10 | 89.63 (19)  | N3—Mn1—N2   | 108.4 (2)   |
| O6—Mn1—N3   | 91.18 (19)  | O8—Mn1—O10 | 88.88 (18)  | O3—Mn1—N2   | 73.59 (18)  |
| O8—Mn1—N3   | 79.29 (19)  | N3—Mn1—O10 | 93.85 (19)  | O10—Mn1—N2  | 157.71 (17) |
| O6—Mn1—O3   | 90.64 (18)  | O3—Mn1—O10 | 84.14 (17)  | O24—Mn2—O4  | 170.5 (2)   |
| O8—Mn1—O3   | 98.82 (18)  | O6—Mn1—N2  | 89.63 (19)  | O24—Mn2—N7  | 91.5 (2)    |
| N3—Mn1—O3   | 177.28 (19) | O8—Mn1—N2  | 95.39 (19)  | O4—Mn2—N7   | 79.4 (2)    |
| O24—Mn2—O5  | 97.17 (19)  | O5—Mn2—O15 | 82.77 (19)  | O21—Mn3—O7  | 171.09 (18) |
| O4—Mn2—O5   | 92.08 (19)  | O24—Mn2—N4 | 85.25 (19)  | O21—Mn3—N5  | 91.7 (2)    |
| N7—Mn2—O5   | 170.2 (2)   | O4—Mn2—N4  | 95.78 (19)  | O7—Mn3—N5   | 79.5 (2)    |
| O24—Mn2—O15 | 89.8 (2)    | N7—Mn2—N4  | 113.39 (19) | O21—Mn3—O2  | 92.15 (18)  |
| O4—Mn2—O15  | 93.3 (2)    | O5—Mn2—N4  | 71.97 (17)  | O7—Mn3—O2   | 96.48 (18)  |
| N7—Mn2—O15  | 92.8 (2)    | O15—Mn2—N4 | 153.39 (19) | N5—Mn3—O2   | 174.8 (2)   |
| O21—Mn3—O9  | 90.03 (19)  | N5—Mn3—N8  | 109.6 (2)   | O16—Mn4—O12 | 94.1 (2)    |

## Supporting Information

|             |            |             |             |             |           |
|-------------|------------|-------------|-------------|-------------|-----------|
| O7—Mn3—O9   | 88.65 (19) | O2—Mn3—N8   | 73.76 (17)  | O19—Mn4—O12 | 95.6 (3)  |
| N5—Mn3—O9   | 92.37 (19) | O9—Mn3—N8   | 157.95 (17) | N9—Mn4—O12  | 170.7 (2) |
| O2—Mn3—O9   | 84.20 (17) | O16—Mn4—O19 | 170.3 (2)   | O16—Mn4—O18 | 94.2 (4)  |
| O21—Mn3—N8  | 90.95 (19) | O16—Mn4—N9  | 91.0 (2)    | O19—Mn4—O18 | 86.8 (5)  |
| O7—Mn3—N8   | 93.58 (18) | O19—Mn4—N9  | 79.3 (3)    | N9—Mn4—O18  | 90.3 (3)  |
| O12—Mn4—O18 | 81.6 (2)   | O13—Mn5—O11 | 170.9 (2)   | O13—Mn5—O17 | 88.2 (2)  |
| O16—Mn4—N6  | 91.7 (2)   | O13—Mn5—N1  | 91.4 (2)    | O11—Mn5—O17 | 92.3 (2)  |
| O19—Mn4—N6  | 91.5 (3)   | O11—Mn5—N1  | 79.4 (2)    | N1—Mn5—O17  | 90.7 (2)  |
| N9—Mn4—N6   | 114.6 (2)  | O13—Mn5—O14 | 93.7 (2)    | O14—Mn5—O17 | 85.3 (2)  |
| O12—Mn4—N6  | 73.0 (2)   | O11—Mn5—O14 | 95.4 (2)    | O13—Mn5—N10 | 91.6 (2)  |
| O18—Mn4—N6  | 154.3 (3)  | N1—Mn5—O14  | 173.3 (2)   | O11—Mn5—N10 | 91.2 (2)  |
| N1—Mn5—N10  | 110.3 (2)  | O14—Mn5—N10 | 73.9 (2)    | O17—Mn5—N10 | 159.1 (2) |

## 2. BVS calculations

Bond valence sum (BVS) values was calculated for each Mn centers in **1**, **2**, **3** and **4** respectively. The calculations were performed with the help of standard relevant parameters reported in the literature.<sup>1,2</sup>

**Table S6.1.** BVS calculations of **1**.

| A <sub>i</sub> - B <sub>j</sub> | R(Å)  | S <sub>ij</sub> | ΣS <sub>ij</sub> | Conclusion |
|---------------------------------|-------|-----------------|------------------|------------|
| Mn(1)-O(1)                      | 1.928 | 0.635           | 3.304            | Mn(III)    |
| Mn(1)-O(3)                      | 2.178 | 0.323           |                  |            |
| Mn(1)-O(2)                      | 1.925 | 0.640           |                  |            |
| Mn(1)-O(4)                      | 2.172 | 0.328           |                  |            |
| Mn(1)-O(6)                      | 1.893 | 0.698           |                  |            |
| Mn(1)-N(1)                      | 1.972 | 0.684           |                  |            |
| A <sub>i</sub> - B <sub>j</sub> | R(Å)  | S <sub>ij</sub> | ΣS <sub>ij</sub> | Conclusion |
| Mn(2)-O(6)                      | 1.897 | 0.691           |                  |            |

## Supporting Information

|             |       |       |       |         |
|-------------|-------|-------|-------|---------|
| Mn(2)-O(8)  | 2.234 | 0.277 | 3.101 | Mn(III) |
| Mn(2)-O(6)  | 1.891 | 0.701 |       |         |
| Mn(2)-O(10) | 2.257 | 0.261 |       |         |
| Mn(2)-O(9)  | 1.957 | 0.587 |       |         |
| Mn(2)-N(7)  | 1.959 | 0.584 |       |         |

**Table S6.2.** BVS Calculations for **2**.

| A <sub>i</sub> - B <sub>j</sub> | R(Å)  | S <sub>ij</sub> | ΣS <sub>ij</sub> | Conclusion |
|---------------------------------|-------|-----------------|------------------|------------|
| Mn(1)-O(2)                      | 1.927 | 0.637           | 3.250            | Mn(III)    |
| Mn(1)-O(3)                      | 1.896 | 0.692           |                  |            |
| Mn(1)-O(3)                      | 2.242 | 0.272           |                  |            |
| Mn(1)-O(1)                      | 1.881 | 0.721           |                  |            |
| Mn(1)-N(1)                      | 1.987 | 0.658           |                  |            |
| Mn(1)-O(4)                      | 2.244 | 0.270           |                  |            |

**Table S6.3.** BVS Calculations for **3**.

| A <sub>i</sub> - B <sub>j</sub> | R(Å)  | S <sub>ij</sub> | ΣS <sub>ij</sub> | Conclusion |
|---------------------------------|-------|-----------------|------------------|------------|
| Mn(1)-O(3)                      | 2.218 | 0.290           | 3.212            | Mn(III)    |
| Mn(1)-O(3)                      | 1.890 | 0.704           |                  |            |
| Mn(1)-O(2)                      | 1.978 | 0.555           |                  |            |
| Mn(1)-O(1)                      | 1.887 | 0.709           |                  |            |
| Mn(1)-N(3)                      | 1.974 | 0.681           |                  |            |
| Mn(1)-N(1)                      | 2.313 | 0.273           |                  |            |



**Table S6.4.** BVS Calculations for **4**.

| A <sub>i</sub> - B <sub>j</sub> | R(Å)  | S <sub>ij</sub> | ΣS <sub>ij</sub> | Conclusion |
|---------------------------------|-------|-----------------|------------------|------------|
| Mn(1)-N(2)                      | 2.318 | 0.268           | 3.207            | Mn(III)    |
| Mn(1)-N(3)                      | 1.954 | 0.719           |                  |            |
| Mn(1)-O(3)                      | 1.961 | 0.580           |                  |            |
| Mn(1)-O(6)                      | 1.871 | 0.740           |                  |            |
| Mn(1)-O(8)                      | 1.928 | 0.635           |                  |            |
| Mn(1)-O(10)                     | 2.251 | 0.265           |                  |            |
| A <sub>i</sub> - B <sub>j</sub> | R(Å)  | S <sub>ij</sub> | ΣS <sub>ij</sub> | Conclusion |
| Mn(3)-N(5)                      | 1.936 | 0.754           | 3.252            | Mn(III)    |
| Mn(3)-N(8)                      | 2.340 | 0.253           |                  |            |
| Mn(3)-O(2)                      | 1.945 | 0.606           |                  |            |
| Mn(3)-O(7)                      | 1.911 | 0.664           |                  |            |
| Mn(3)-O(9)                      | 2.279 | 0.245           |                  |            |
| Mn(3)-O(21)                     | 1.876 | 0.730           |                  |            |
| A <sub>i</sub> - B <sub>j</sub> | R(Å)  | S <sub>ij</sub> | ΣS <sub>ij</sub> | Conclusion |
| Mn(2)-N(4)                      | 2.375 | 0.230           | 3.288            | Mn(III)    |
| Mn(2)-N(7)                      | 1.952 | 0.723           |                  |            |
| Mn(2)-O(5)                      | 1.960 | 0.582           |                  |            |
| Mn(2)-O(4)                      | 1.902 | 0.681           |                  |            |
| Mn(2)-O(24)                     | 1.838 | 0.809           |                  |            |
| Mn(2)-O(15)                     | 2.253 | 0.263           |                  |            |
| A <sub>i</sub> - B <sub>j</sub> | R(Å)  | S <sub>ij</sub> | ΣS <sub>ij</sub> | Conclusion |

|             |       |       |       |         |  |
|-------------|-------|-------|-------|---------|--|
| Mn(5)-N(1)  | 1.956 | 0.715 | 3.265 | Mn(III) |  |
| Mn(5)-N(10) | 2.312 | 0.273 |       |         |  |
| Mn(5)-O(11) | 1.926 | 0.638 |       |         |  |
| Mn(5)-O(13) | 1.847 | 0.790 |       |         |  |
| Mn(5)-O(14) | 1.967 | 0.571 |       |         |  |
| Mn(5)-O(17) | 2.233 | 0.278 |       |         |  |

| A <sub>i</sub> - B <sub>j</sub> | R(Å)  | S <sub>ij</sub> | ΣS <sub>ij</sub> | Conclusion |
|---------------------------------|-------|-----------------|------------------|------------|
| Mn(4)-N(6)                      | 2.350 | 0.246           | 3.303            | Mn(III)    |
| Mn(4)-N(9)                      | 1.944 | 0.738           |                  |            |
| Mn(4)-O(18)                     | 2.247 | 0.268           |                  |            |
| Mn(4)-O(12)                     | 1.950 | 0.598           |                  |            |
| Mn(4)-O(16)                     | 1.847 | 0.790           |                  |            |
| Mn(4)-O(19)                     | 1.912 | 0.663           |                  |            |

### 3. Powder X-ray Diffraction studies

The crystals of complexes **1-4** were grounded gently using mortar and pestle to make them into a powdered form. About 30 mg of powdered sample of complexes **1-4** were taken on a quartz plate and their powder X-ray diffraction pattern were recorded using Bruker D8 advance PXRD in the 2θ range of 5° to 55° under ambient conditions. Each samples were undergone 2 h scanning period to obtain a resolved peak in a peak profile. The powder X-ray diffraction pattern of all the four complexes were discussed below. Among them, the peak profile of the complexes **2** and **3** were compared together to understand their phase and bulk purity. The well

matching spectra of their simulated and experimental pattern suggest that the complexes are pure in bulk phase.

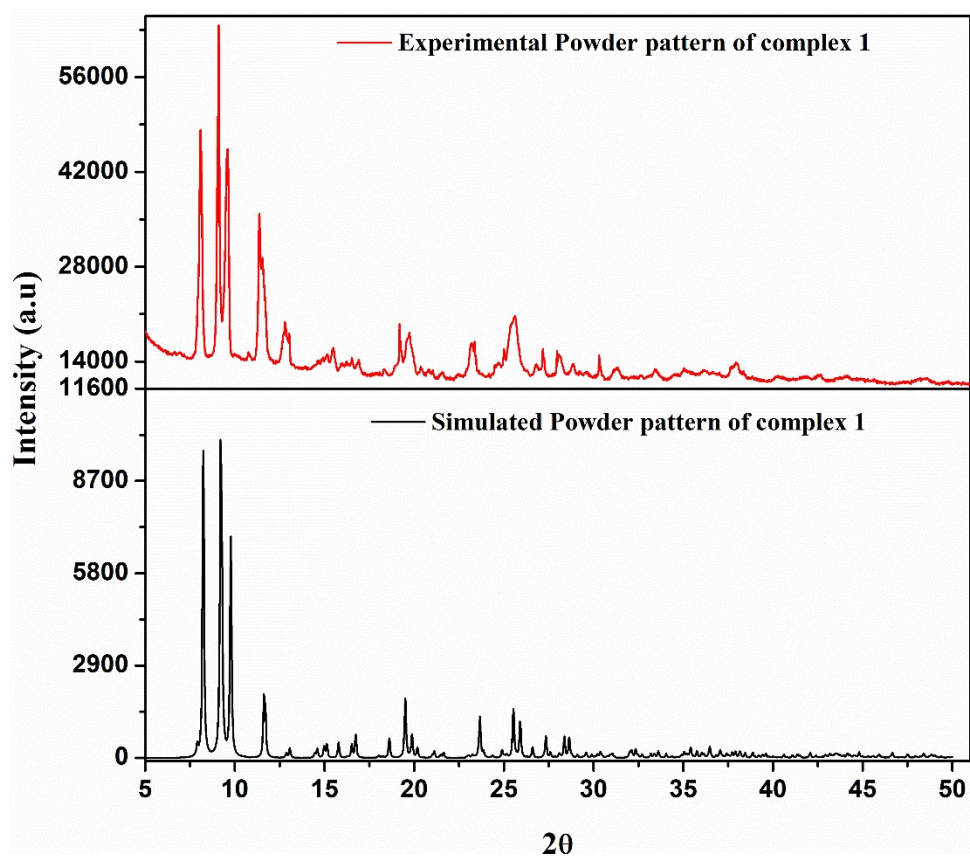

**Figure S2.** Simulated and experimentally obtained powder X-ray diffraction patterns of complex **1**.

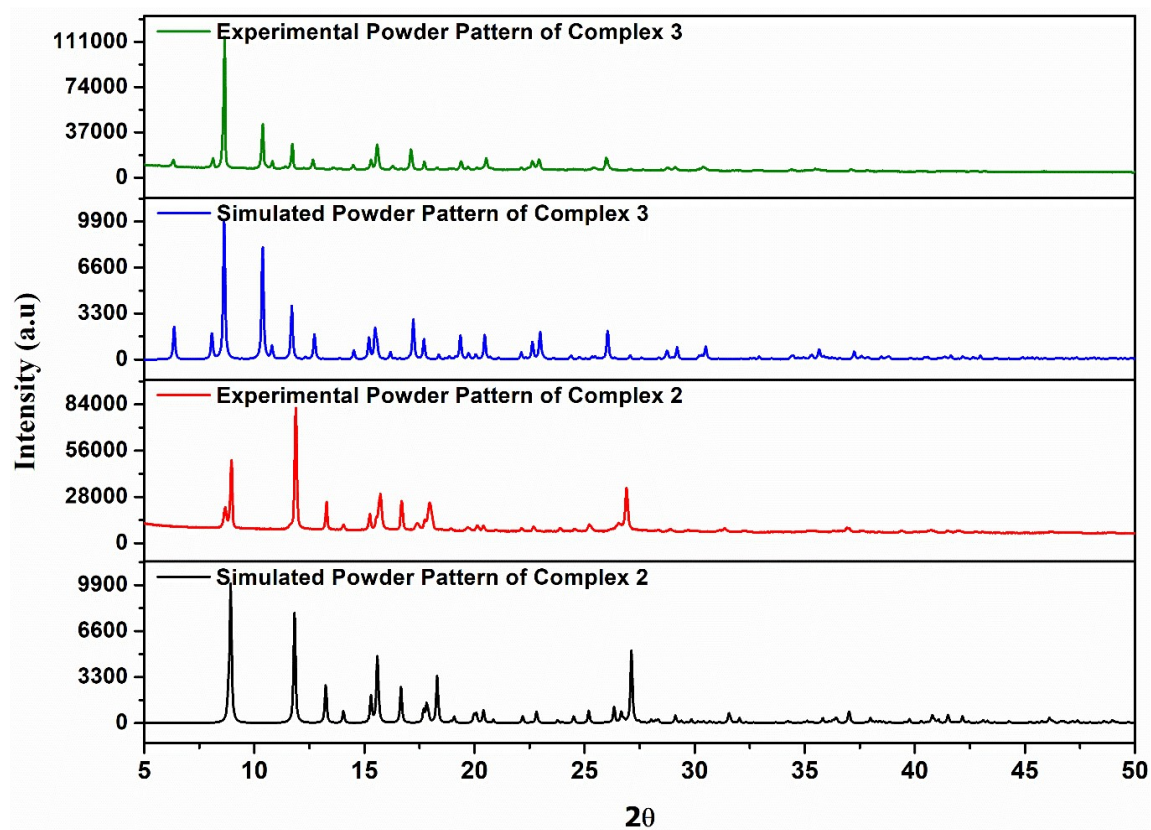

**Figure S3.** Comparison of simulated and experimentally obtained powder X-ray diffraction patterns of complexes 2 and 3.

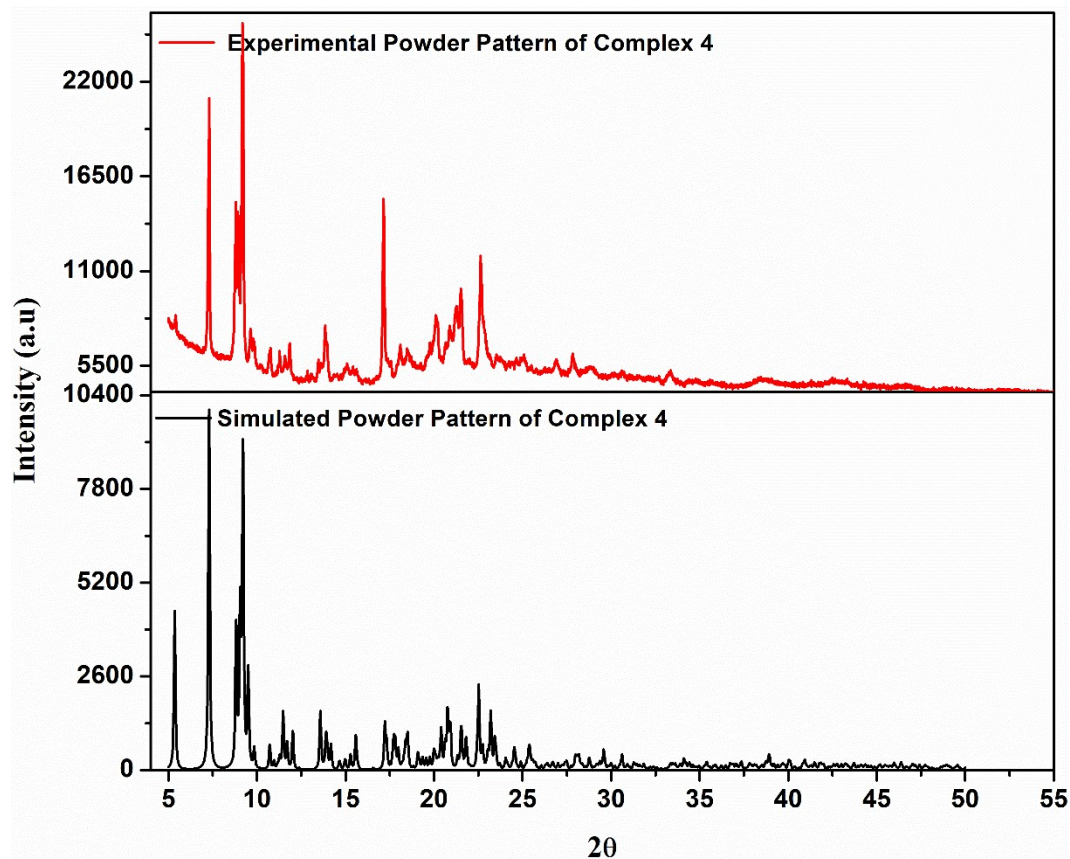

**Figure S4.** Simulated and experimentally obtained powder X-ray diffraction patterns of complex **4**. The diffraction at  $2\theta$  of  $17^\circ$  in the experimental curve is due to the lattice DMF/H<sub>2</sub>O molecules which were omitted during structure refinement since they were highly disordered.

#### 4. Infrared spectra

Infrared (IR) spectra was recorded for all the three complexes **1**, **2** and **3** in the region of 500-3500 cm<sup>-1</sup>. It was recorded using Jasco FT-IR-4100 spectrometer by preparing KBr pellet. The samples were grounded well in order to make it a fine powder and kept under the sodium lamp for few minutes. Then by using pressurized pellet making machine disk like pellets were made and carried out the analysis. The strong and broad absorptions observed for **1**, **2** and **3** in the range 3400-3500 cm<sup>-1</sup> indicate the presence of free -OH or H<sub>2</sub>O. Sharp peaks obtained 1500-1600 cm<sup>-1</sup> shows C=C stretching. Absorptions of 2943 and 3082 cm<sup>-1</sup> in the non-coordinated ligands are missing in **1**, **2** and **3**, indicating the coordination of Ar-O<sup>-</sup> to the metal centre. The shifting of free  $\nu_{C=N}$  to lower region in all the three complexes is due to the presence of coordinated imine with metal. Likewise, the  $\nu_{C-O}$  appears in the region 1240-1290 cm<sup>-1</sup> in the free ligand shifted to a lower frequency region in the complexes, indicate the participation of phenolic oxygen in C-O-M formation. The new vibrations obtained in the region 400-600 cm<sup>-1</sup> in **1**, **2** and **3** are assigned as M-O and M-N frequencies.

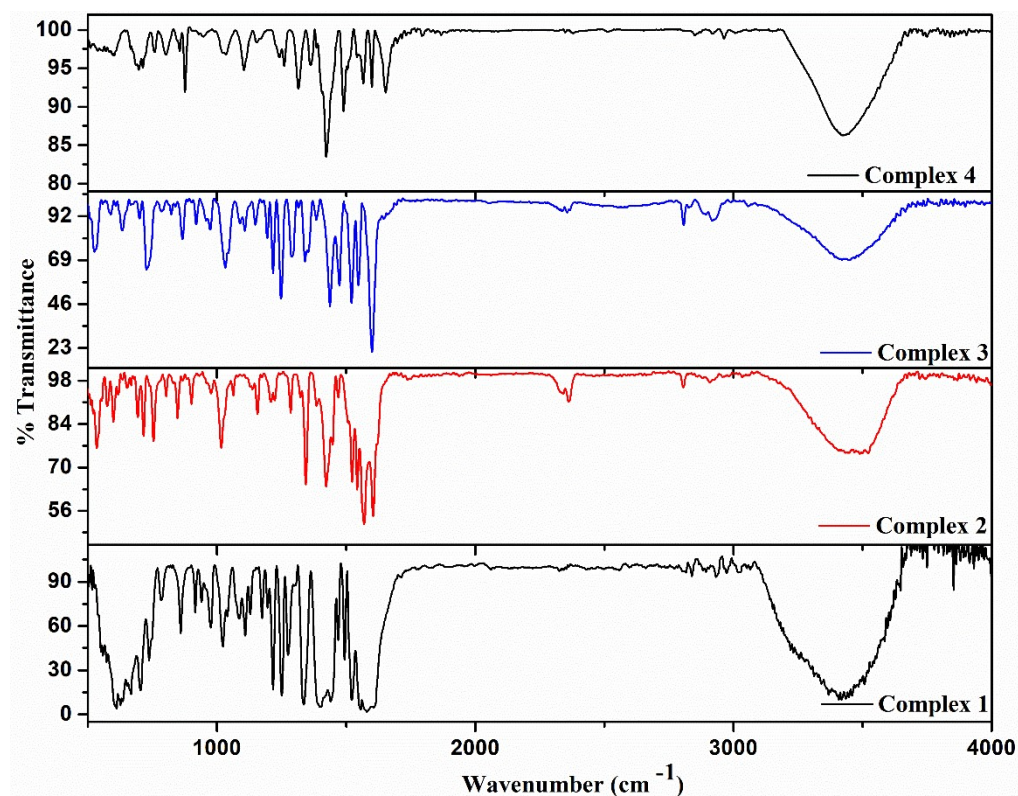

**Figure S5.** FT-IR spectra of **1**, **2** and **3** and **4**.

**Table S7.** IR stretching frequencies of **1**, **2**, **3** and **4** are given below.

| Complexes        | $\nu_{\text{Ar-OH/H}_2\text{O}}$ | $\nu_{\text{C}=\text{C}}$ | $\nu_{\text{C}=\text{N}}$ | $\nu_{\text{C-O}}$    | $\nu_{\text{C-H}}$<br>Out of plane bending |
|------------------|----------------------------------|---------------------------|---------------------------|-----------------------|--------------------------------------------|
| Complex <b>1</b> | 3417 $\text{cm}^{-1}$            | 1581 $\text{cm}^{-1}$     | 1595 $\text{cm}^{-1}$     | 1024 $\text{cm}^{-1}$ | 849 $\text{cm}^{-1}$                       |
| Complex <b>2</b> | 3478 $\text{cm}^{-1}$            | 1573 $\text{cm}^{-1}$     | 1608 $\text{cm}^{-1}$     | 1017 $\text{cm}^{-1}$ | 759 $\text{cm}^{-1}$                       |
| Complex <b>3</b> | 3542 $\text{cm}^{-1}$            | 1602 $\text{cm}^{-1}$     | 1612 $\text{cm}^{-1}$     | 1248 $\text{cm}^{-1}$ | 729 $\text{cm}^{-1}$                       |
| Complex <b>4</b> | 3423 $\text{cm}^{-1}$            | 1567 $\text{cm}^{-1}$     | 1601 $\text{cm}^{-1}$     | 1033<br>1             | 758 $\text{cm}^{-1}$                       |

## 5. UV-Visible measurements

The UV-Visible spectra of **1**, **2**, **3** and **4** was recorded by dissolving those in MeOH solvent to study the possible transitions in the visible region. The absorption bands obtained in each of their spectra is by dissolving the samples with methanol in a 3.5 mL cuvette with a path length of 1cm at ambient temperature and which were recorded by using Jasco V-650 UV-Visible



spectrometer. From the range of 350-900 nm the corresponding spectra were recorded.

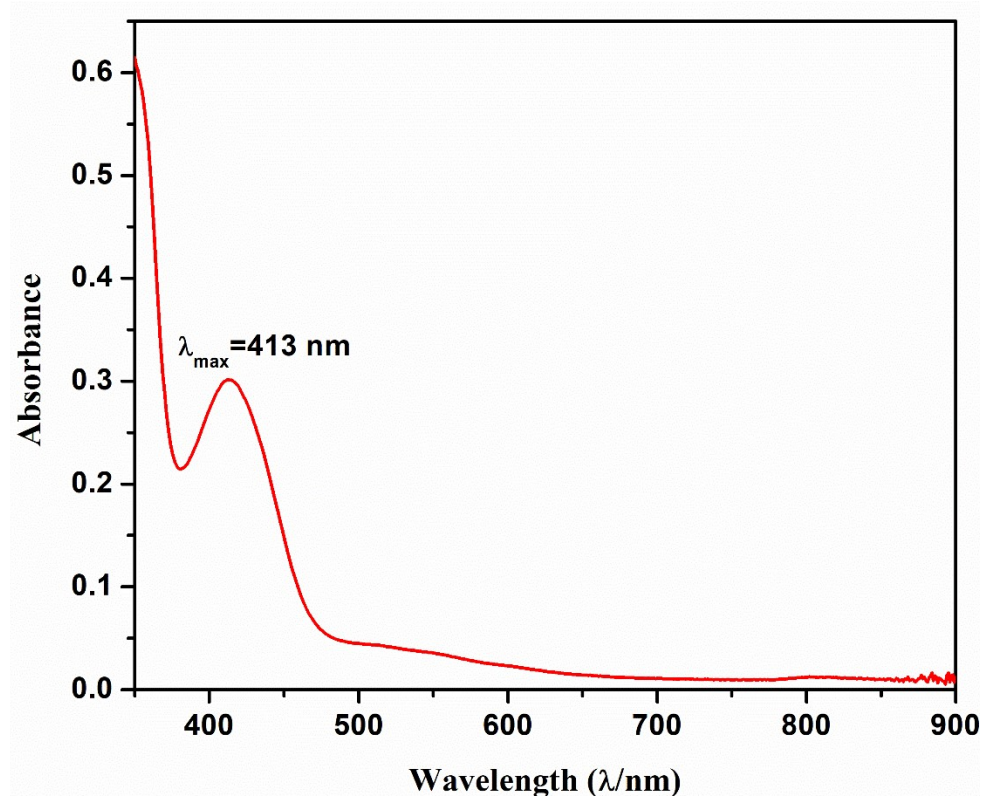

**Figure S6.** UV-Vis spectrum of **1** in MeOH.

The peak corresponds to the cut-off wavelength of the solvent was not considered and hence it is not shown. The  $\lambda_{\text{max}}$  absorption at around 413 nm is due to the azo (N=N-) group which might be conjugated with the aromatic  $\pi$  system.

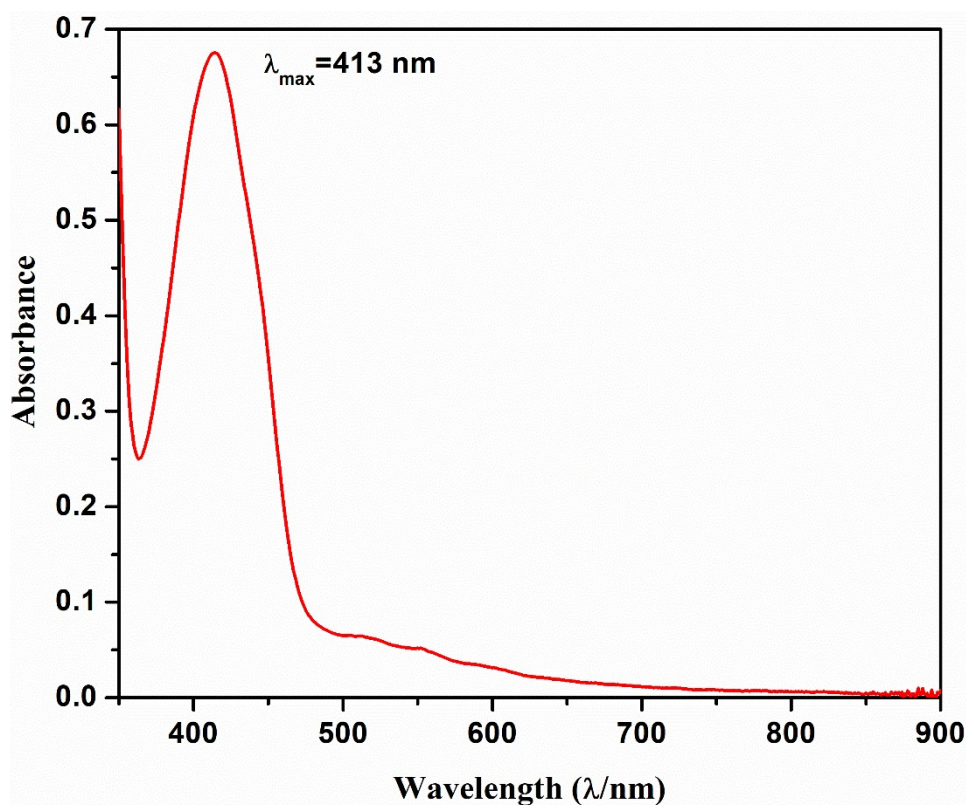

**Figure S7.** UV-Vis spectrum of **2** in MeOH.

The UV-Visible spectrum of **2** shows absorptions at about 413 nm corresponding to the azo group participation in conjugation with the aromatic system.

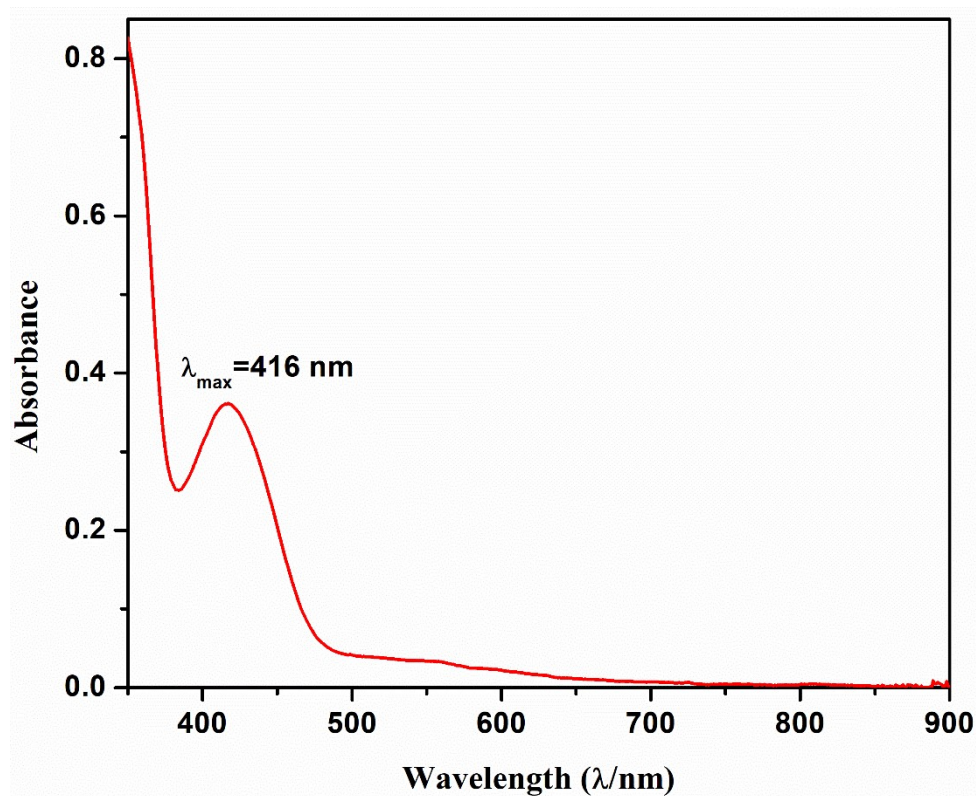

**Figure S8.** UV-Vis spectrum of **3** in MeOH.



The UV-Visible spectrum of **3** shows  $\lambda_{\text{max}}$  absorption at 415 nm due to the possible conjugation of -N=N- with the  $\pi$  aromatic ring system.

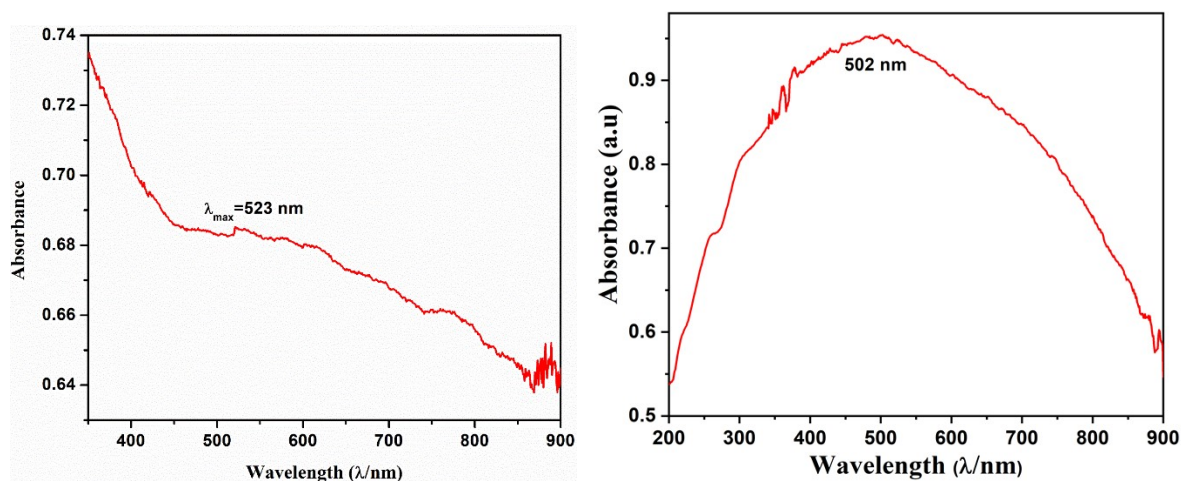

**Figure S9.** UV-Vis spectrum of diluted solution (left) of **4** in MeOH. DRS solid state UV-Vis spectrum of **4** (right).

The UV-Visible spectrum of **4** shows a weak band at 523 nm due to the probable  $n \rightarrow \pi^*$  transition of -C=S- group with in the conjugated  $\pi$  aromatic ring system of ligand molecule.

## 6. Thermo-gravimetric analysis of complexes

Thermo-gravimetric analysis of the complexes **1-3** was recorded by heating 4.5-5 mg of each sample from the room temperature to 900 °C at a heating rate of 20 °C under the flow of nitrogen at the flow rate of 60 mL/min on TA Instruments model-Q500. The TGA of complex **4** was carried out under areal atmosphere.

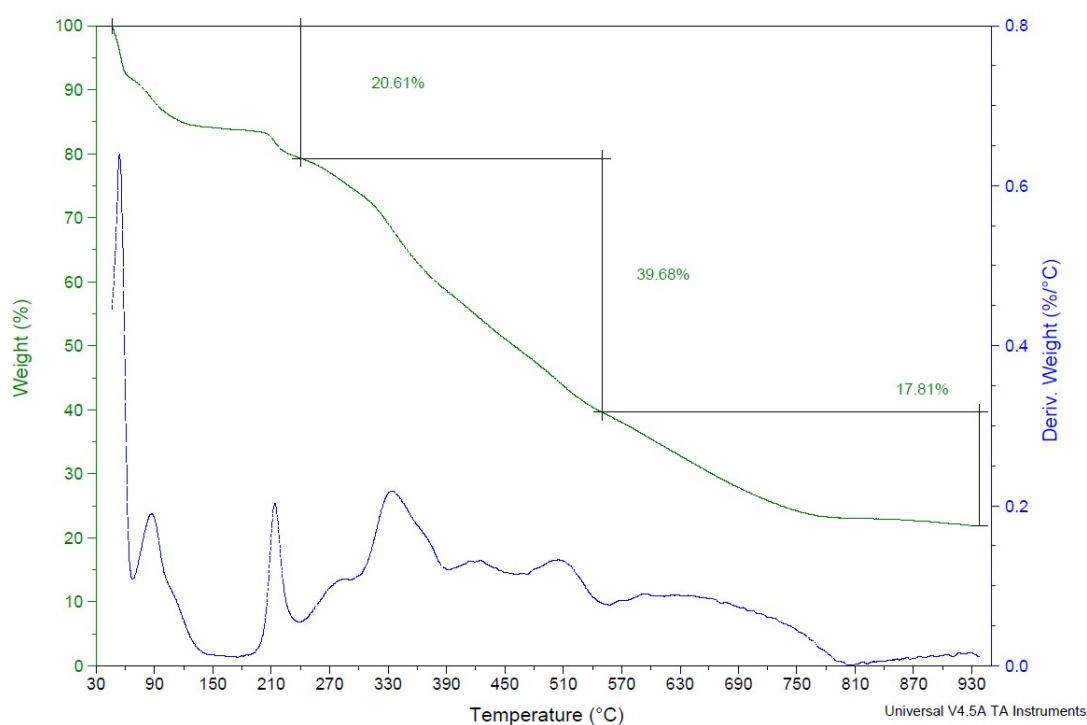

**Figure S10.** TGA plot of complex **1**.

In the TGA plot of complex **1**, the first step of weight loss was 20.61% at 220 °C due to the loss of one ligand (calculated weight %: 20.35). When there is a further increase in temperature from 220-510 °C, a considerable weight loss observed around 39.68% suggests the loss of two Mn atoms along with a ligand and four coordinated solvent methanol molecules (calculated weight %: 38.11). 17.81% of weight loss at the final step matches with the elimination of four bridged acetate molecules (calculated weight %: 17.91).

TGA plot of complex **2**, shows sequential weight losses such as 17.54 %, 39.37 %, and 13.31 % in the first, second and third steps respectively. The first weight loss of 17.54 % was observed in the range of 270-340 °C due to the loss of coordinated solvent methanol molecules and phenyl part of one of the ligands coordinated to metal (calculated weight %: 17.92). Second weight loss (39.37 %) was noticed from 390-500 °C due to the removal of the remaining part of the first ligand, methyl moiety, and another ligand leaving behind oxide with the metal (calculated weight %: 39.95).

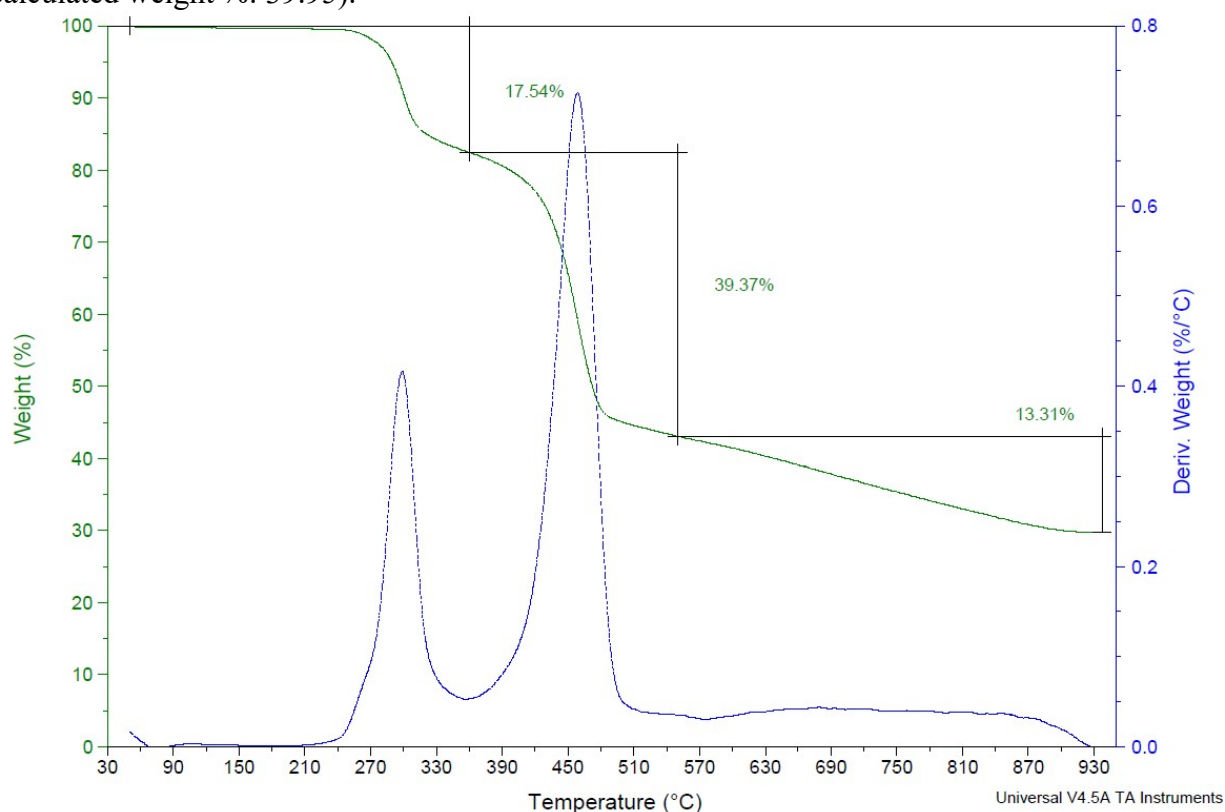**Figure S11.** TGA plot of complex **2**.

Further temperature ramping above 550 °C, resulting the weight loss of 13.31 % due to the loss of methyl group of bridged methoxy and two metals. (Calculated weight %: 14.06)

In TGA plot of complex **3**, the first loss of 9.515 % was due to the weight loss of two methoxy

groups, which was observed in the range of 220-300 °C (Calculated weight %: 8.72). When the temperature ramped to 400 °C, we noticed a 22.75 % weight loss due to the detachment of part of the organic moiety from one of the ligands (Calculated weight %: 22.80). Then finally, 28.50 % of the loss was due to the decomposition of part of another ligand leaving behind pyridine moiety and two methoxy groups (Calculated weight %: 29.4).

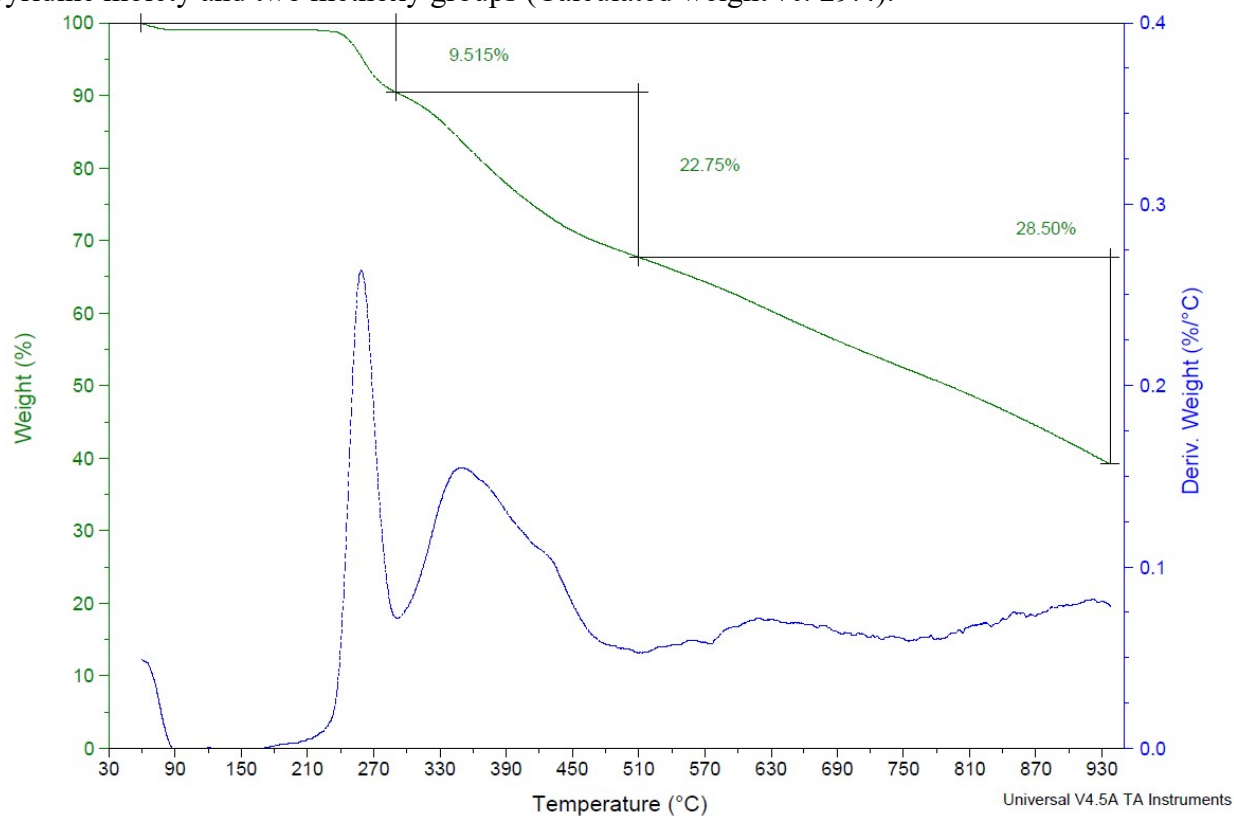

**Figure S12.** TGA Plot of Complex 3

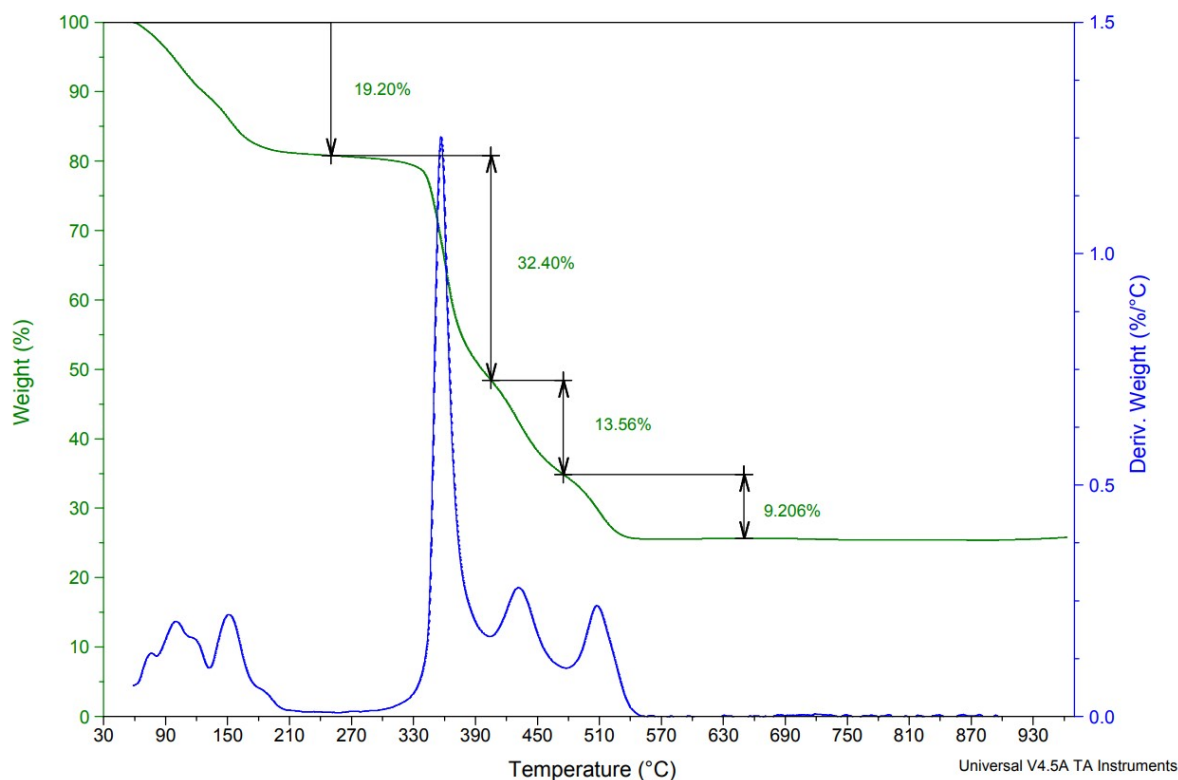

**Figure S13.** TGA Plot of complex  $[\text{Mn}_{10}(\text{L}^4)_8(\text{OL}^4)_2(\text{DMF})_4(\text{MeOH})_4(\text{H}_2\text{O})_2]$  (**4**) under air. TGA was performed under areal condition. The first step in the thermal loss of a complex  $[\text{Mn}_{10}(\text{L}^4)_8(\text{OL}^4)_2(\text{DMF})_4(\text{MeOH})_4(\text{H}_2\text{O})_2]$  (**4**) undergoes loss of coordinated solvents and lattice solvents in the temperature range of 40-200 °C. This weight loss of 19.20 % closely matches with the loss of four coordinated DMF, four MeOH, two  $\text{H}_2\text{O}$  molecules and additional lattice solvents (2 DMF and one  $\text{H}_2\text{O}$  molecules which were omitted during structure refinements since they are disordered) leading to the formation of  $[\text{Mn}_{10}(\text{L}^4)_8(\text{OL}^4)_2]$ . It is stable in the temperature of 200-300 °C and subsequently it undergoes loss of organic ligands 550 °C leading to the formation of  $\alpha\text{-Mn}_2\text{O}_3$  as the most stable product (see section 10 for powder XRD pattern).

## 7. Magnetic Plots of complexes 1-3:

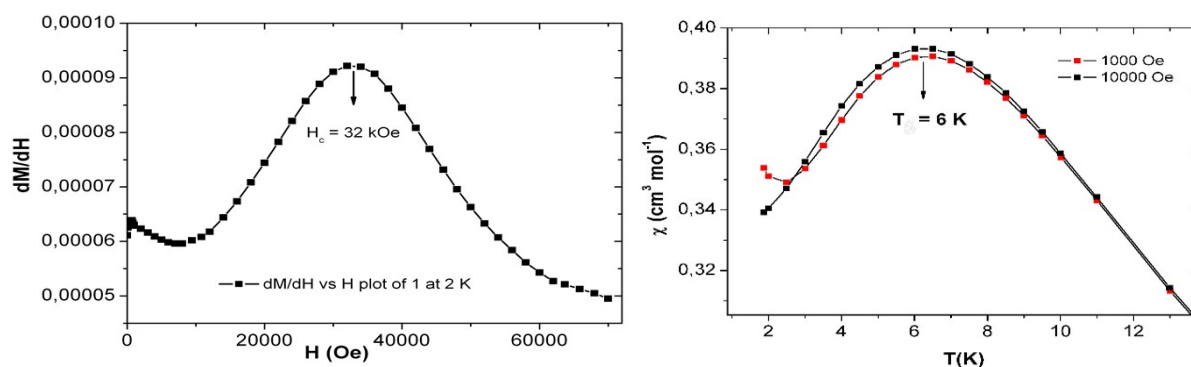

**Figure S14.** Plots of  $dM/dH$  vs  $H$  (left) and  $\chi$  vs  $T$  (right) of complex **1**.

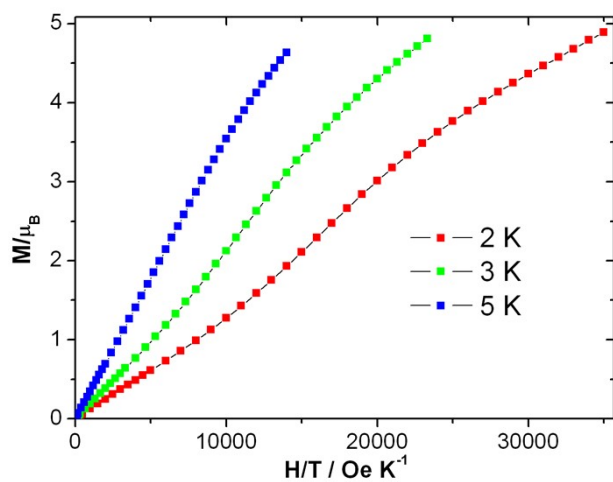

**Figure S15.** Plots of  $M$  vs  $H/T$  at indicated temperature of complex **1**.

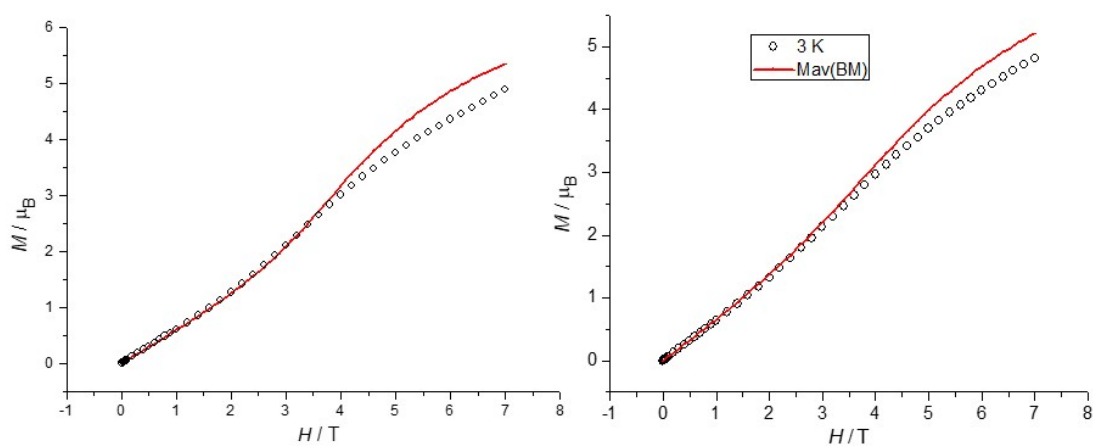

**Figure S16.** Fit of  $M$  vs  $H$  plots of **1** at 2 K (left) and 3 K (right). Proposed field dependent spin structures of complex **1** (bottom). The arrows represent the Jahn-Teller anisotropic magnetic axis.

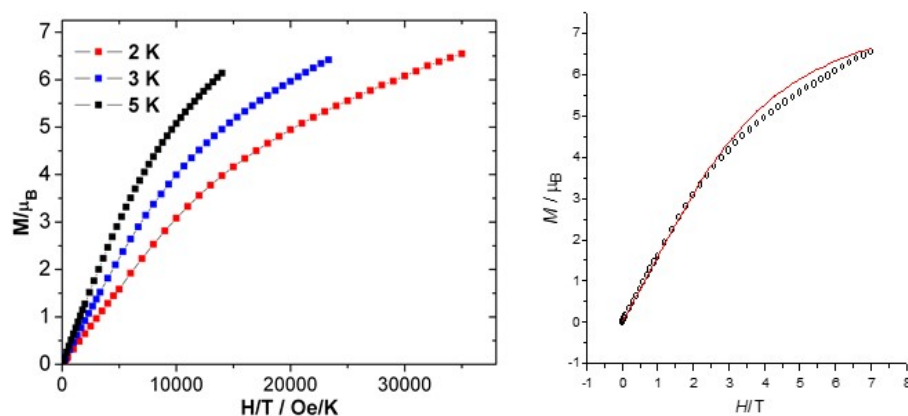

**Figure S17.** Plots of  $M$  vs  $H/T$  (left) and fit of  $M$  vs  $H$  plot of **2** at 2 K (right).

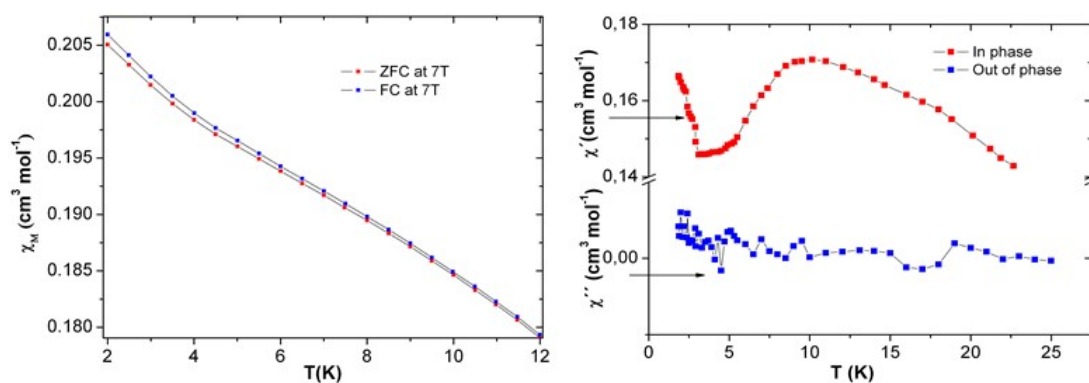

**Figure S18.** Plots of ZFC and FC susceptibilities vs  $T$  of **2** at 70 kOe (left). Plots  $\chi'$ ,  $\chi''$  vs  $T$  of **2** under dc field = 3 Oe (right). Frequency of 1000 Hz.

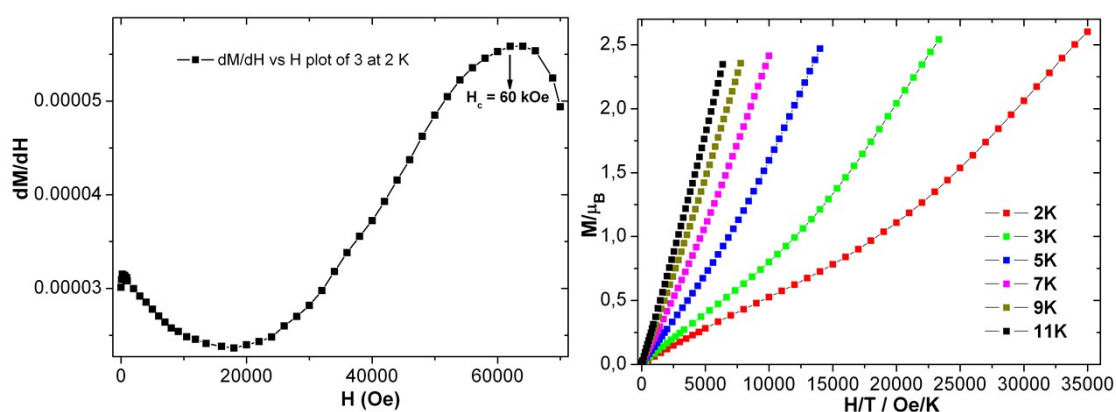

**Figure S19.** Plots of  $dM/dH$  vs  $H$  of **3** at 2 K (left) and  $M$  vs  $H/T$  (right)

## 8. Theoretical calculations:

**Table S8.** BS-DFT computed energies of high-spin and six broken-symmetry solution on the X-ray crystal structure of complex **1**. Here we have chosen six broken-symmetry solutions to extract the  $J$  value using the  $H = -2JS_1S_2$  formalism.

| Solutions  | Energy (cm <sup>-1</sup> ) | $\rho^{\text{Mn1}}$ | $\rho^{\text{Mn2}}$ | $\rho^{\text{Mn3}}$ | $\rho^{\text{Mn4}}$ | $\langle S^2 \rangle$ |
|------------|----------------------------|---------------------|---------------------|---------------------|---------------------|-----------------------|
| <b>HS</b>  | -7991.51590                | 3.77                | 3.81                | 3.77                | 3.81                | 72.1365               |
| <b>BS1</b> | -7991.51734                | <b>-3.73</b>        | 3.79                | 3.77                | 3.79                | 24.0988               |
| <b>BS2</b> | -7991.51983                | 3.75                | <b>-3.76</b>        | 3.75                | 3.80                | 24.0795               |
| <b>BS3</b> | -7991.51734                | 3.77                | 3.79                | <b>-3.73</b>        | 3.79                | 24.0988               |
| <b>BS4</b> | -7991.51983                | 3.75                | 3.80                | 3.75                | <b>-3.76</b>        | 24.0795               |
| <b>BS5</b> | -7991.51989                | <b>-3.75</b>        | <b>-3.78</b>        | 3.75                | 3.78                | 8.0783                |
| <b>BS6</b> | -7991.51867                | 3.73                | <b>-3.77</b>        | 3.73                | <b>-3.77</b>        | 8.0633                |

$\rho^{\text{Mn}}$  is the spin density on the Mn atom

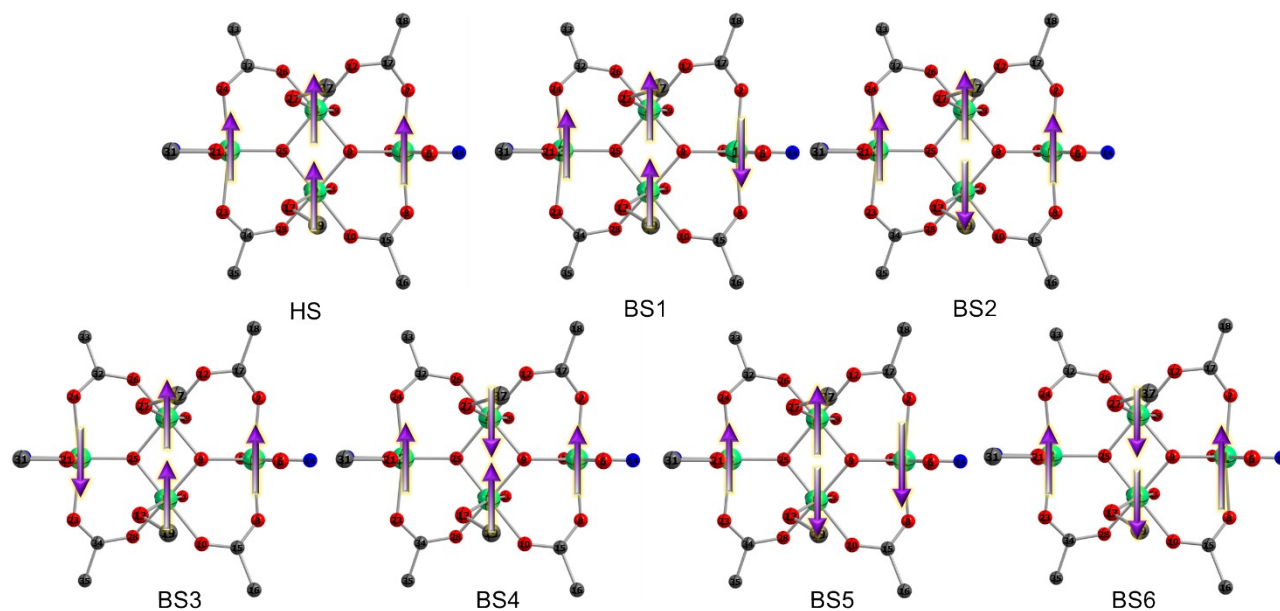

**Figure S20.** DFT computed different spin configurations of complex **1**. The core structure of the Mn<sub>4</sub> butterfly is shown for clarity. (Color code: Mn -Green; O -red; N-blue; C-grey).



**Table S9.** DFT computed  $J$  values along with the corresponding avg.  $\angle\text{Mn-O-Mn}$  bond angle and  $\angle\text{Mn-O-Mn-O}$  dihedral angle of complex **1**.

|           | $J$ values ( $\text{cm}^{-1}$ ) | Average Mn-O-Mn angle ( $^\circ$ ) | Dihedral angle ( $^\circ$ ) |
|-----------|---------------------------------|------------------------------------|-----------------------------|
| $J_{wb1}$ | -7.6                            | 127.6                              | 154.2                       |
| $J_{wb2}$ | -7.6                            | 127.4                              | 147.1                       |
| $J_{bb}$  | -28.0                           | 99.1                               | 0.0                         |
| $J_{ww}$  | -0.6                            | -                                  | -                           |

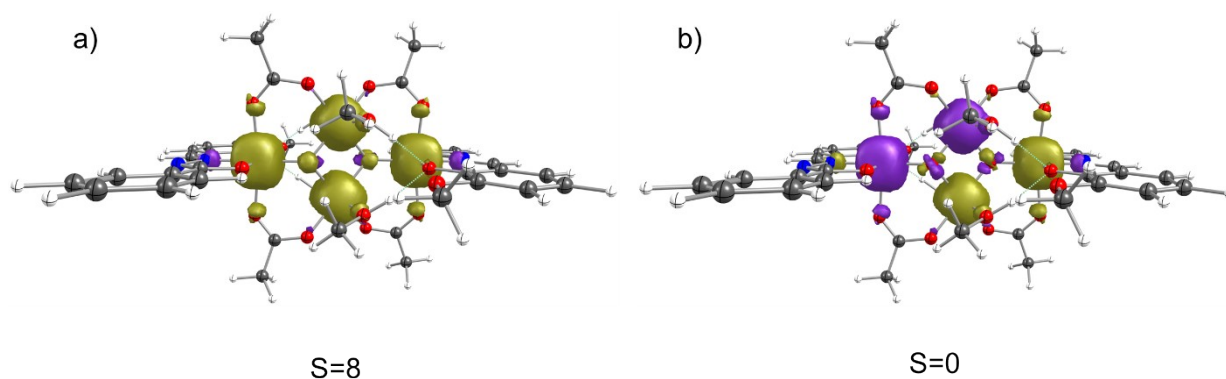**Figure S21.** DFT computed spin-density plot of; (a) High Spin ( $S = 8$ ); (b) Broken Symmetry ( $S = 0$ ) of complex **1**. The olive green and purple color represent the positive and negative spin density respectively, with an isosurface value of  $0.01 \text{ e}^-/\text{bohr}^3$ .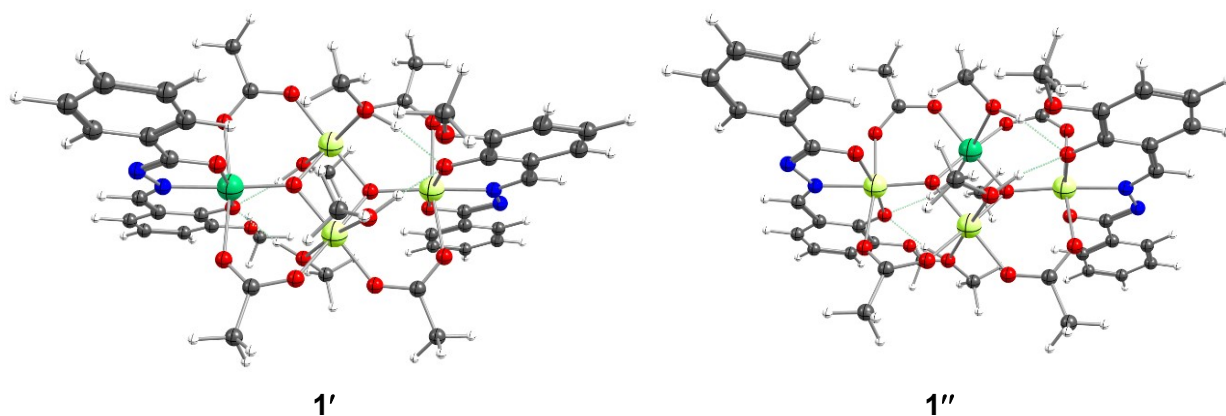**Figure S22.** Monomeric models (**1'** and **1''**) prepared from the crystal structure of complexes **1**. The position of hydrogens was optimized using DFT calculations. (Color code: Mn -Green; Ga-yellow; O -red; N-blue; C-grey; H-white)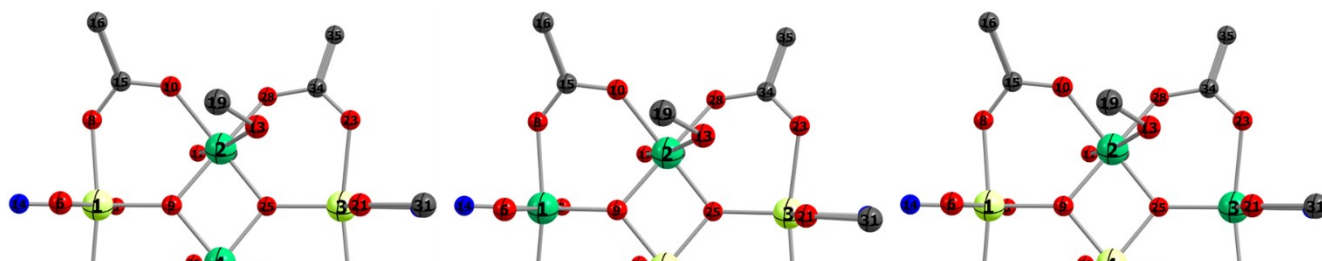



**Figure S23.** Dimeric models (**1<sub>a</sub>**, **1<sub>b</sub>**, **1<sub>c</sub>**) prepared from the crystal structure of complexes **1**. (Color code: Mn -Green; Ga-yellow; O -red; N-blue; C-grey).

**Table S10.** BS-DFT computed energies of high-spin and broken-symmetry solution, spin densities, and  $J$  values for dimeric model **1<sub>a</sub>** equivalent to  $J_{bb}$  interaction of complex **1**.

| Solutions | Energy       | $\rho_1$ | $\rho_2$ | $\rho_3$ | $\rho_4$ | $\langle S^2 \rangle$ | $J$ (cm <sup>-1</sup> ) |
|-----------|--------------|----------|----------|----------|----------|-----------------------|-------------------------|
| HS        | -9561.951994 | 0.01     | 3.79     | 0.01     | 3.79     | 20.0631               | -62.7                   |
| BS        | -9561.954852 | 0.00     | -3.78    | 0.00     | 3.78     | 4.0394                |                         |

$J$  values are estimated using the following equation,

$$J = - \frac{E_{HS} - E_{BS}}{2S_1 S_2 + S_2}$$

**Table S11.** BS-DFT computed energies of high-spin and broken-symmetry solution, spin densities, and  $J$  values for model **1<sub>b</sub>** equivalent to  $J_{wb1}$  interaction of complex **1**.

| Solutions | Energy       | $\rho_1$ | $\rho_2$ | $\rho_3$ | $\rho_4$ | $\langle S^2 \rangle$ | $J$ (cm <sup>-1</sup> ) |
|-----------|--------------|----------|----------|----------|----------|-----------------------|-------------------------|
| HS        | -9561.944614 | 3.76     | 3.81     | 0.00     | 0.02     | 20.0717               | -11.03                  |
| BS        | -9561.945117 | 3.74     | -3.79    | 0.00     | 0.00     | 4.0532                |                         |

$J$  values are estimated using the following equation,

$$J = - \frac{E_{HS} - E_{BS}}{2S_1 S_2 + S_2}$$

**Table S12.** BS-DFT computed energies of high-spin and broken-symmetry solution, spin densities, and  $J$  values for model **1<sub>c</sub>** equivalent to  $J_{wb2}$  interaction of complex **1**.

| Solutions | Energy       | $\rho_1$ | $\rho_2$ | $\rho_3$ | $\rho_4$ | $\langle S^2 \rangle$ | $J$ (cm <sup>-1</sup> ) |
|-----------|--------------|----------|----------|----------|----------|-----------------------|-------------------------|
| HS        | -9561.944654 | 0.00     | 3.81     | 3.76     | 0.02     | 20.0718               | -11.5                   |
| BS        | -9561.945176 | 0.00     | -3.79    | 3.74     | 0.00     | 4.0527                |                         |

$J$  values are estimated using the following equation,

$$J = - \frac{E_{HS} - E_{BS}}{2S1S2 + S2}$$

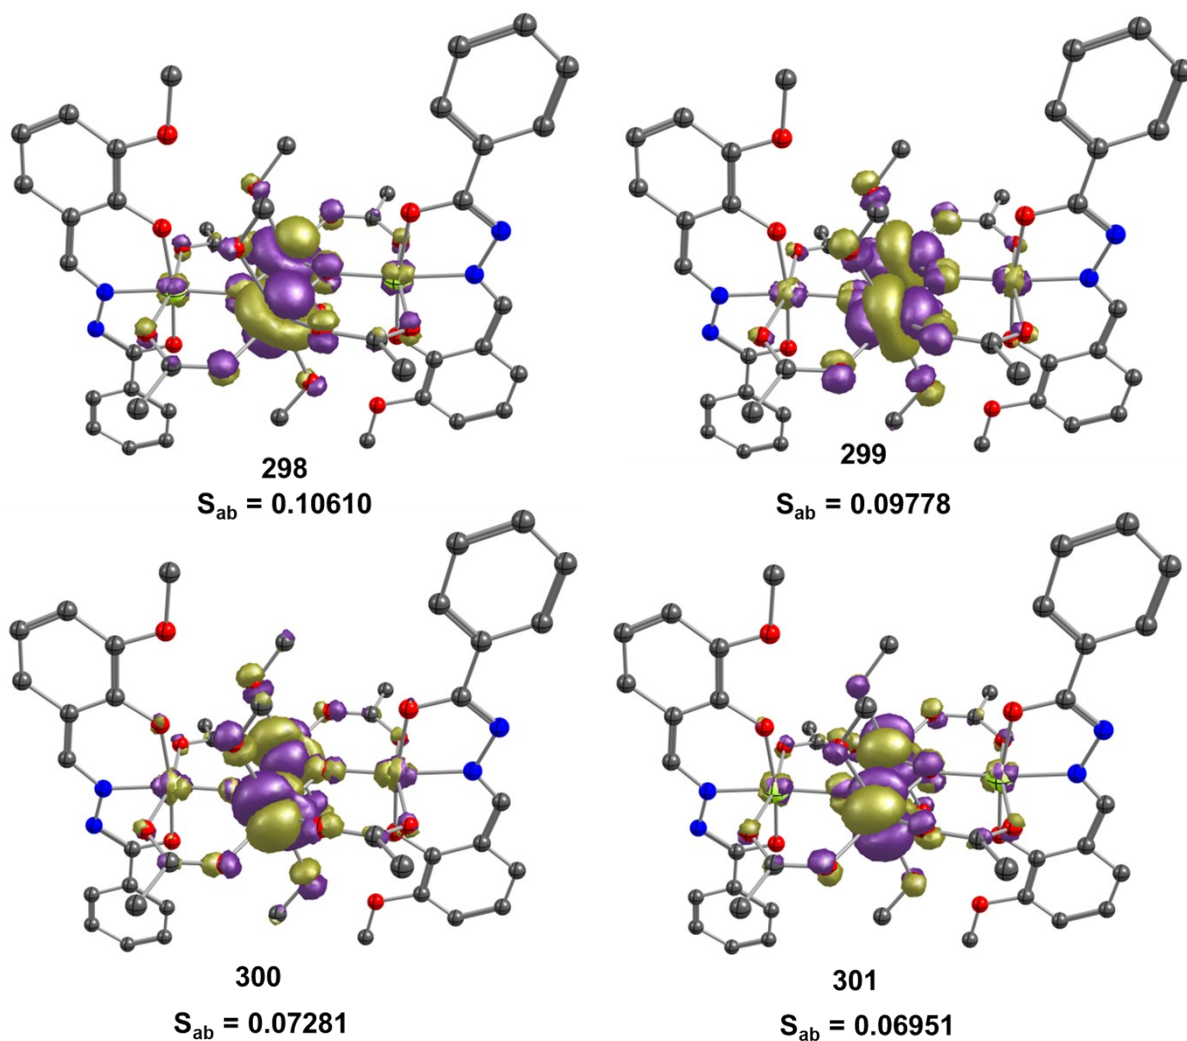

**Figure S24.** DFT computed corresponding orbitals for which the overlap integral values were calculated for  $1_a$  equivalent to  $J_{wb2}$  interaction of complex **1** at contour value = 0.07 e<sup>-</sup>/bohr<sup>3</sup>.

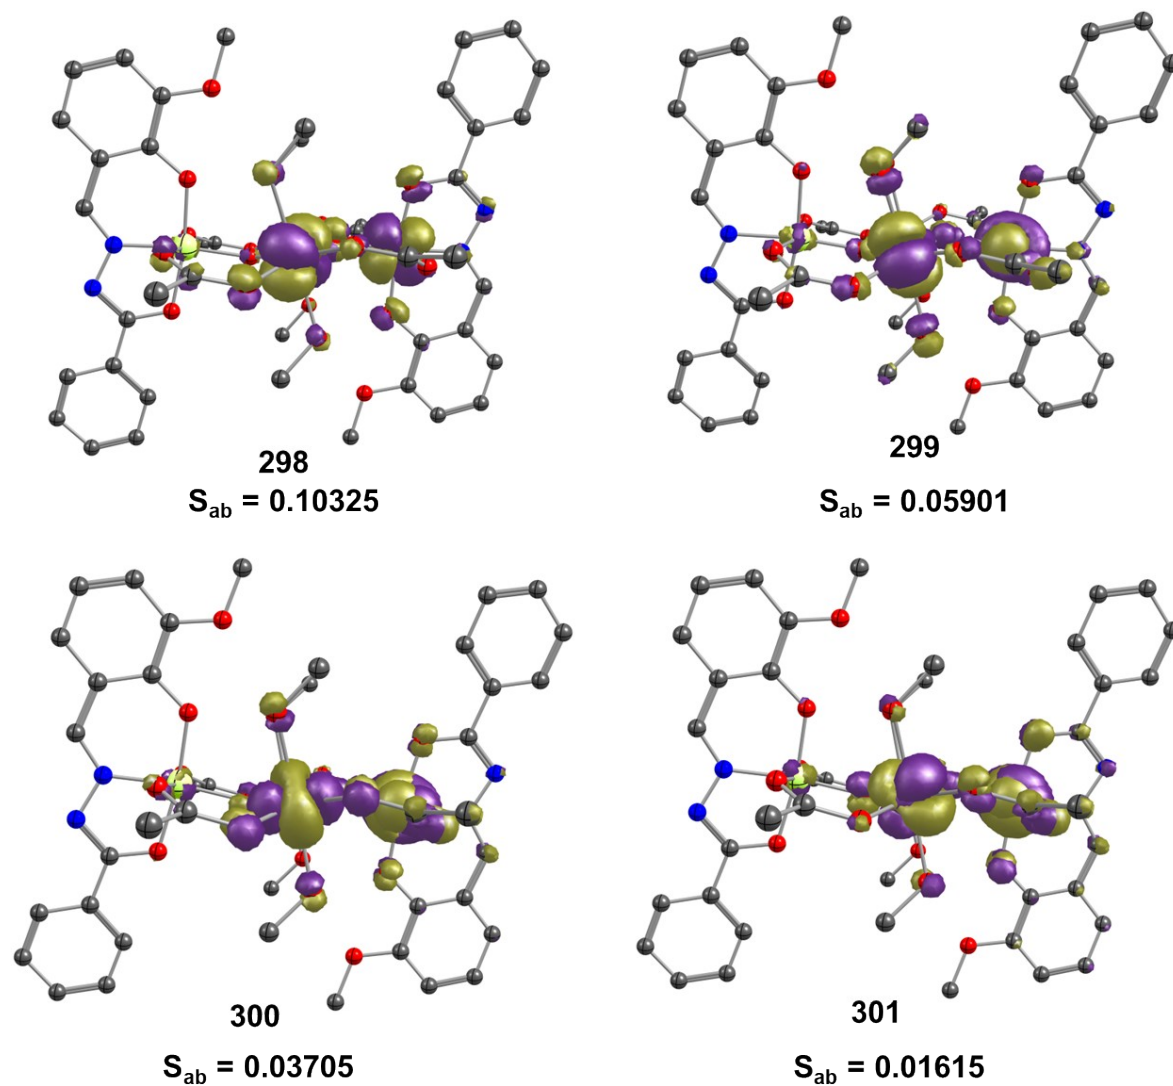

**Figure S25.** DFT computed corresponding orbitals for which the overlap integral values were calculated for  $\mathbf{1}_b$  equivalent to  $J_{wbl}$  interaction of complex **1** at contour value = 0.07 e<sup>-</sup>/bohr<sup>3</sup>.

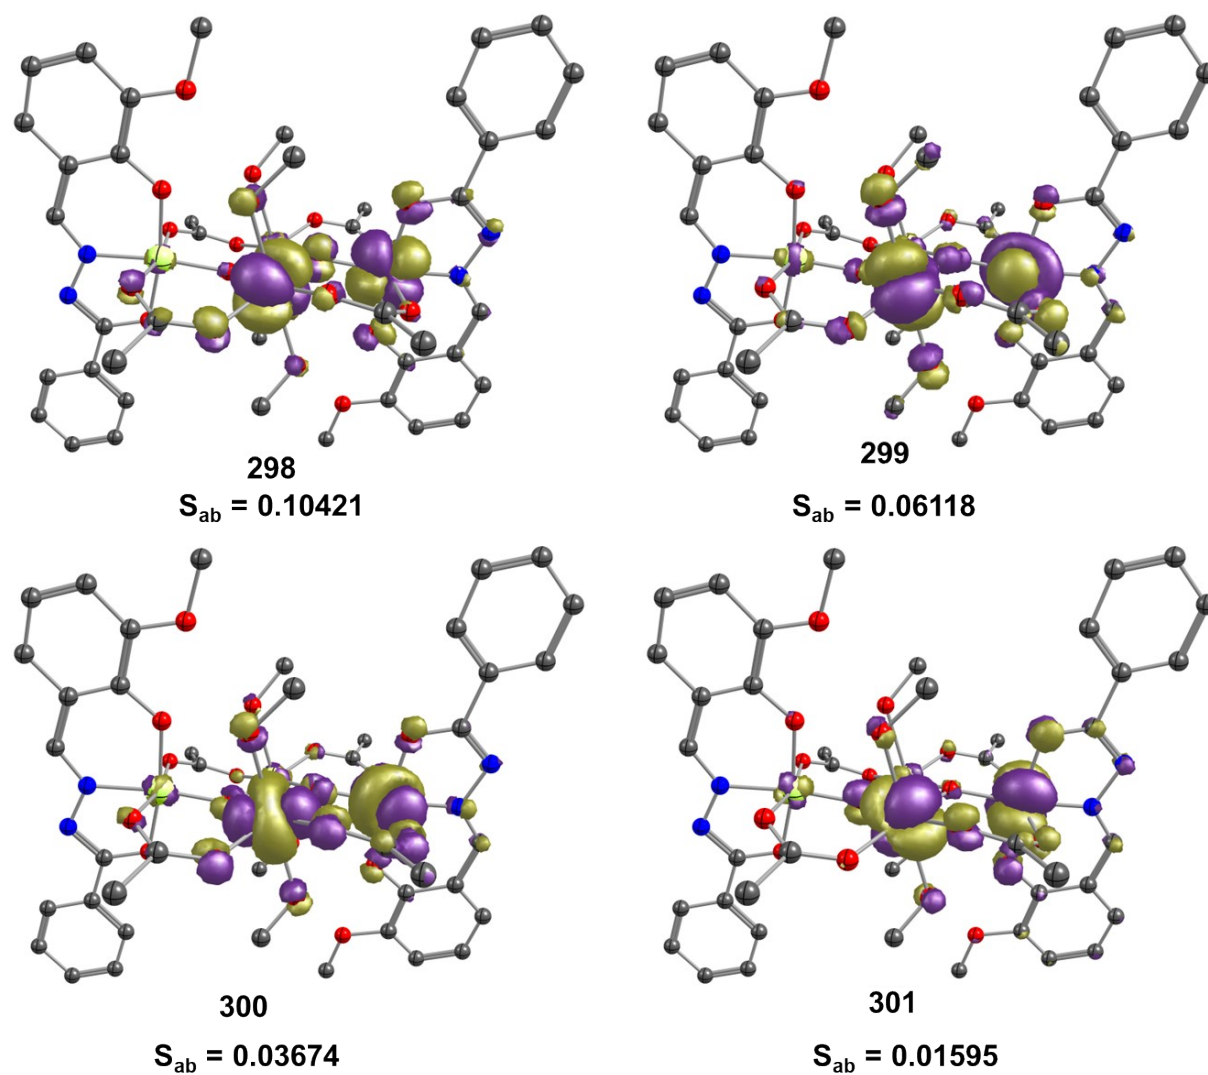

**Figure S26.** DFT computed corresponding orbitals for which the overlap integral values were calculated for  $1_c$  equivalent to  $J_{bb}$  interaction of complex **1** at contour value =  $0.07 \text{ e}^-/\text{bohr}^3$ .

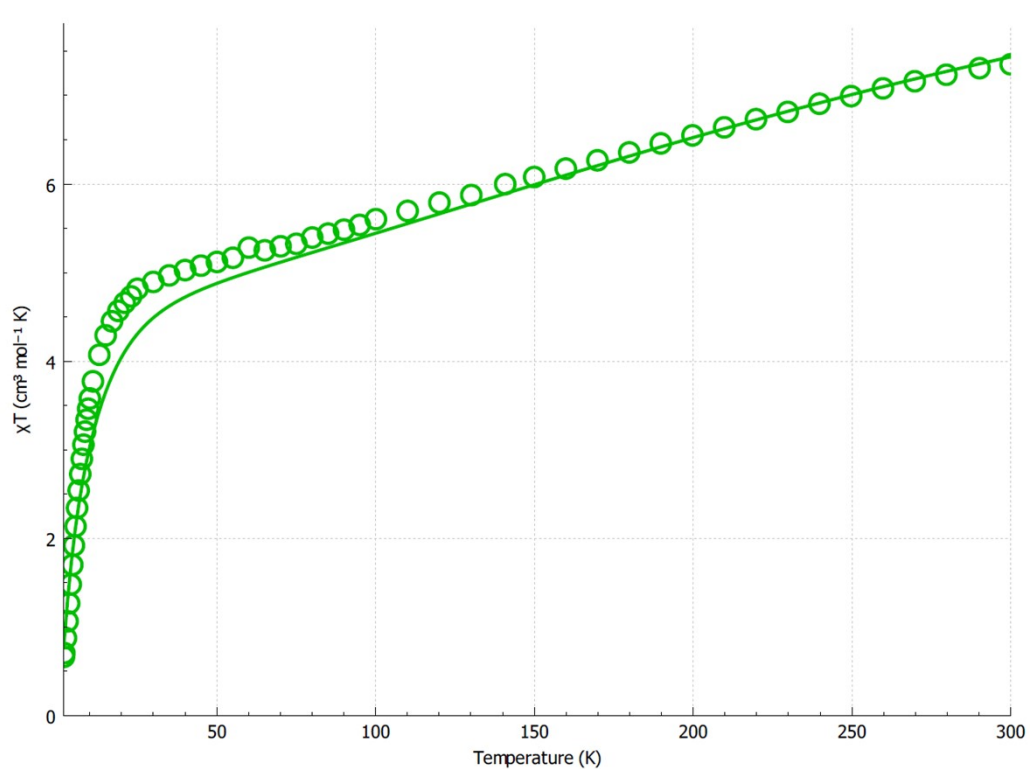

**Figure S27.** Temperature dependence of  $\chi T$  products for complex **1** under a DC field of 1000 Oe. The solid green lines represent simulated  $\chi T$  using the DFT  $J$  values.

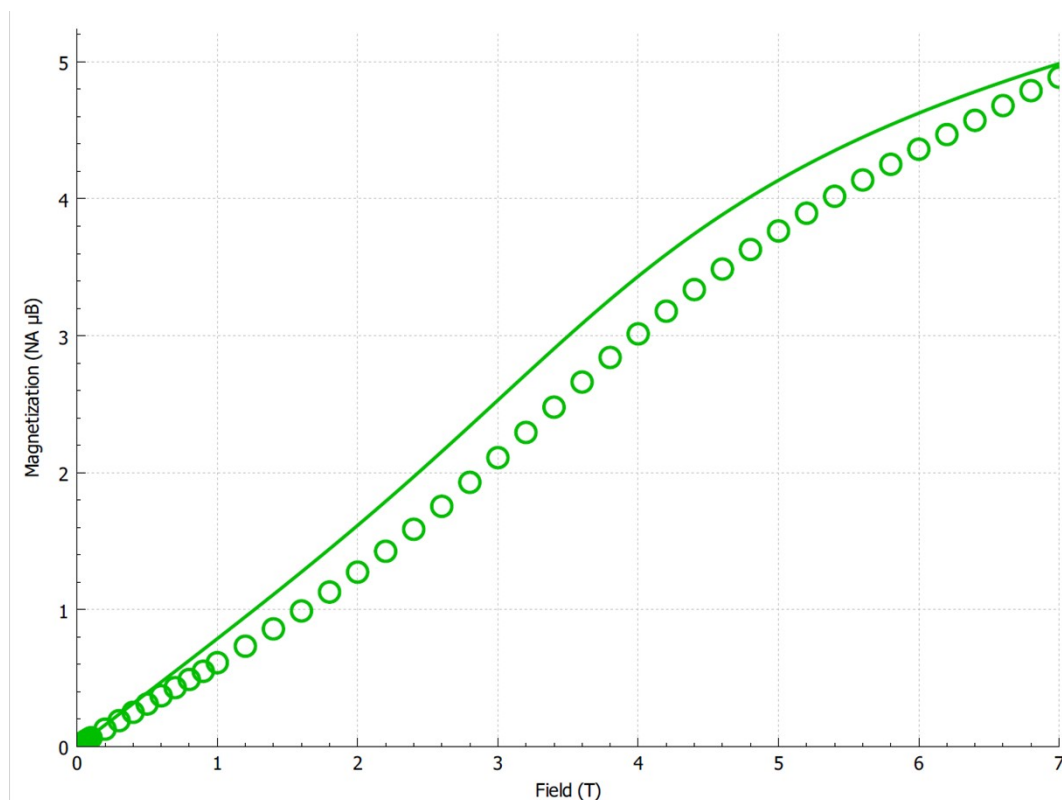

**Figure S28.** Field dependence of the magnetization data at 2 K for complex **1**. The solid green lines represent simulated magnetization using the DFT  $J$  values.

**Table S13.** BS-DFT computed energies of high-spin and broken-symmetry solution, spin densities, and  $J$  values complex **2**.

| Solutions | Energy       | $\rho^{\text{Mn1}}$ | $\rho^{\text{Mn2}}$ | $\langle S^2 \rangle$ | $J$ (cm <sup>-1</sup> ) |
|-----------|--------------|---------------------|---------------------|-----------------------|-------------------------|
| HS        | -4410.840358 | 3.75                | 3.75                | 20.0741               | -0.43                   |
| BS        | -4410.840421 | 3.74                | -3.74               | 4.0598                |                         |

$J$  values are estimated using the following equation,

$$J = - \frac{E_{HS} - E_{BS}}{2S_1 S_2 + S_2}$$

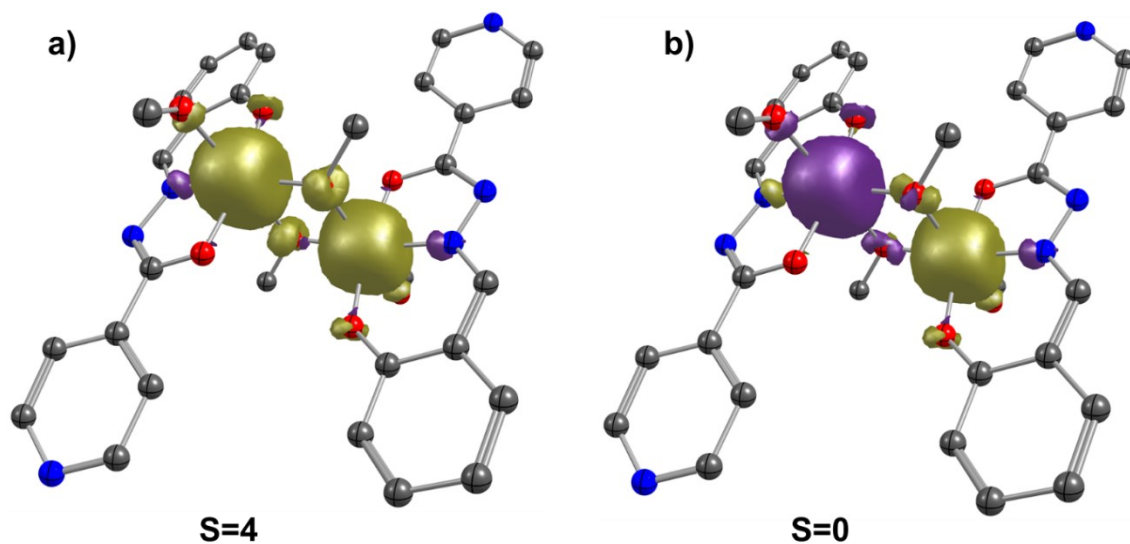**Figure S29.** DFT computed spin-density plot of; (a) High Spin ( $S = 4$ ); (b) Broken Symmetry ( $S = 0$ ) of complex **2**. The olive green and purple color represents the positive and negative spin density respectively, with an isosurface value of 0.01 e<sup>-</sup>/bohr<sup>3</sup>.

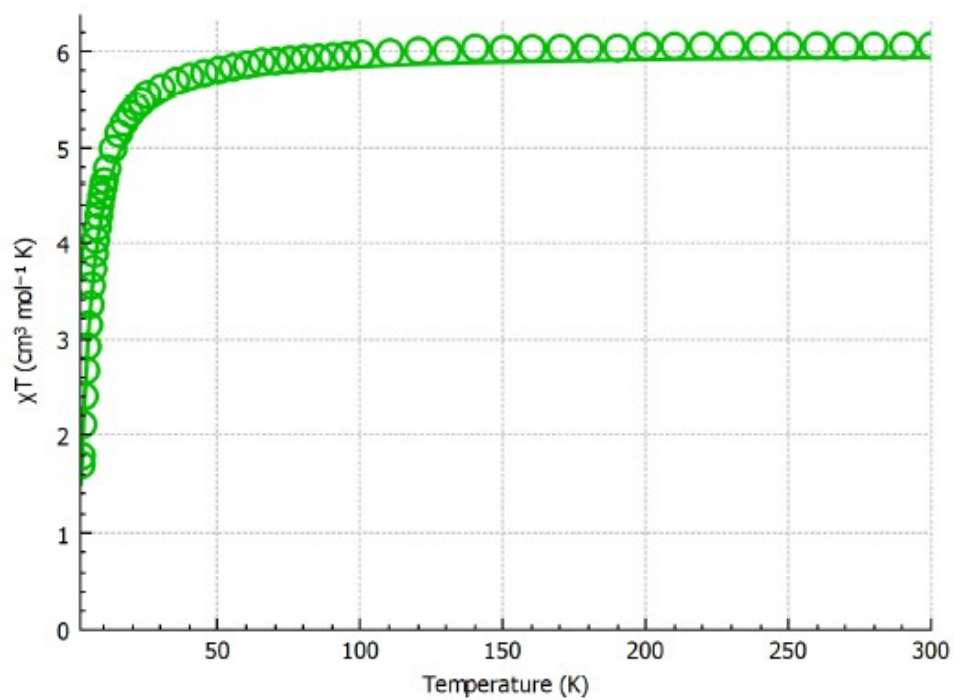

**Figure S30.** Temperature dependence of  $\chi T$  products for complex **2** under a DC field of 1000 Oe. The solid green lines represent simulated  $\chi T$  using the DFT  $J$  values.

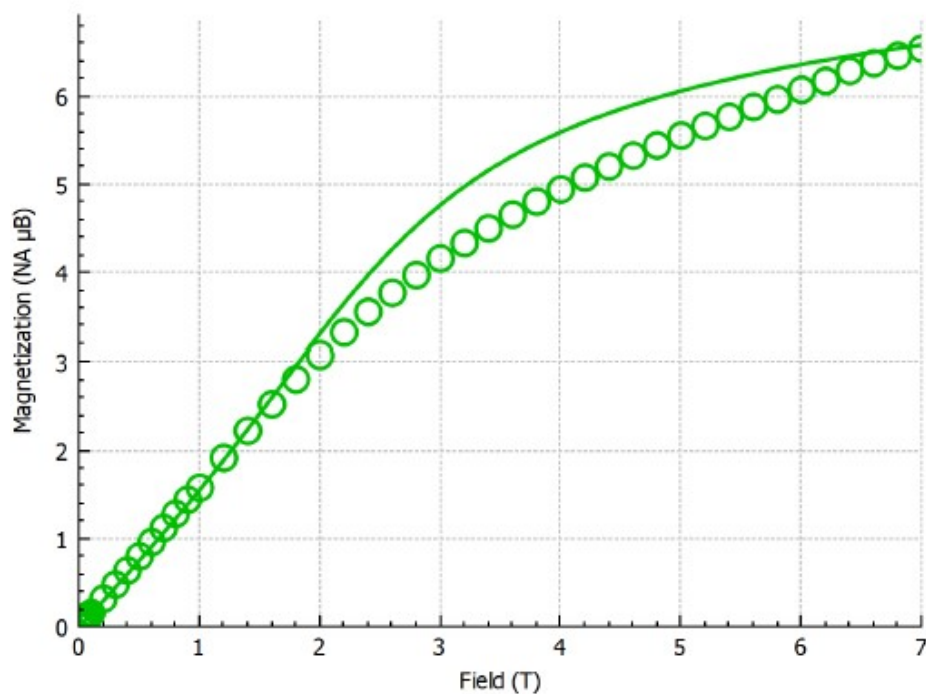

**Figure S31.** Field dependence of the magnetization data at 2 K for complex **2**. The solid green lines represent simulated magnetization data using the DFT  $J$  values.



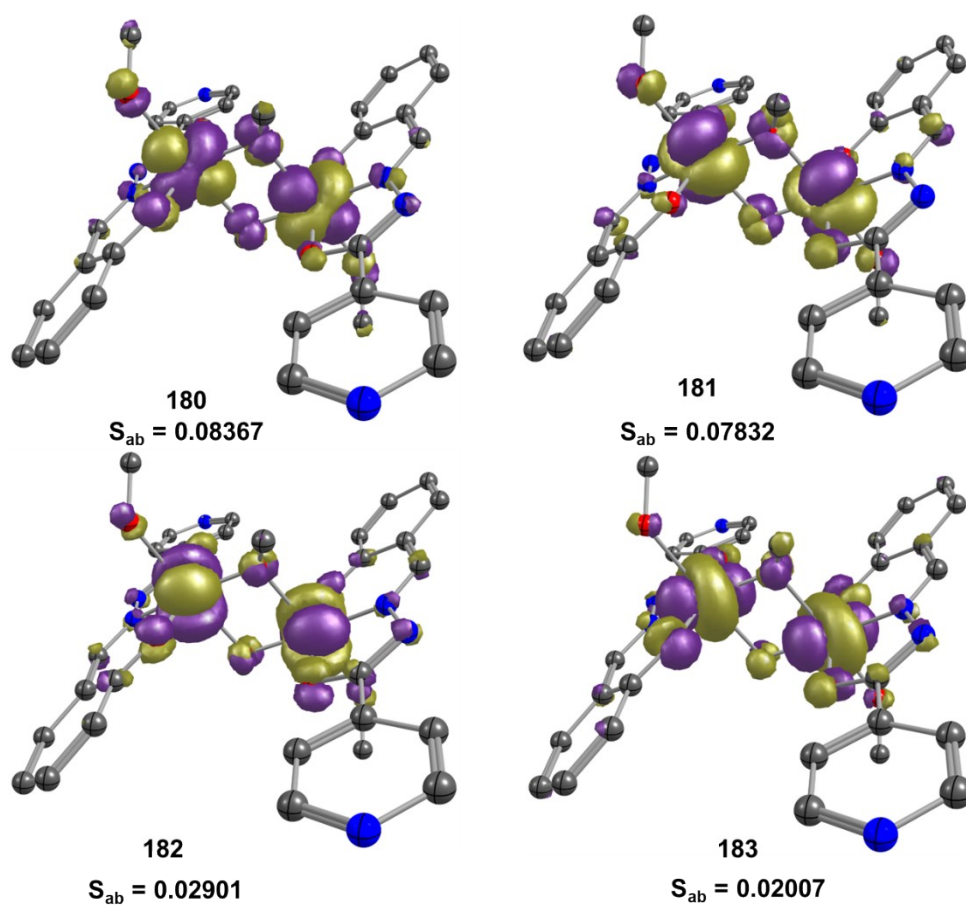

**Figure S32.** DFT computed corresponding orbitals for which the overlap integral values were calculated complex **2** at contour value = 0.07 e<sup>-</sup>/bohr<sup>3</sup>.



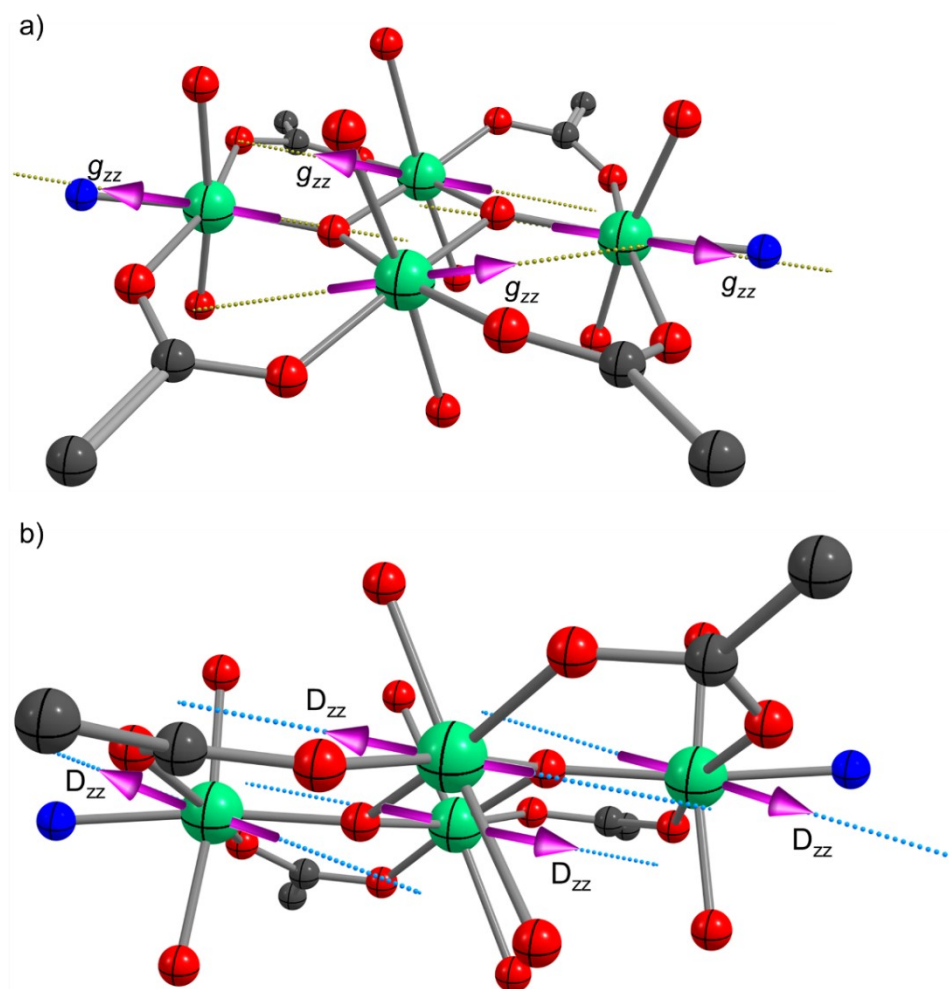

**Figure S33.** CASSCF computed the orientation of the (a)  $g$ -tensor and (b)  $D$ -tensor along the  $z$ -axis (main magnetic axis) for complex **1**.

**Table S14.** CASSCF (5,5) computed Spin–Hamiltonian parameter ( $g$ ,  $D$ ,  $|E/D|$ ) parameters. All the  $D$  values are in  $\text{cm}^{-1}$ .

| Parameters |     | Monomers  |            |
|------------|-----|-----------|------------|
|            |     | <b>1'</b> | <b>1''</b> |
| $D$        | EHA | -3.26     | -3.19      |
|            | PT2 | -3.18     | -3.11      |
| $ E/D $    | EHA | 0.08      | 0.00       |
|            | PT2 | 0.08      | 0.00       |
| $g_{xx}$   |     | 1.970329  | 1.969296   |
| $g_{yy}$   |     | 1.993416  | 1.99448    |
| $g_{zz}$   |     | 1.996547  | 1.995082   |

EHA : Effective Hamiltonian approach ; 2PT : Second order perturbation Theory  
**1'** represents single-ion Mn(III) at wing position in complex **1**; **1''** represents single-ion Mn(III)

at body position in complex **1****Table S15.** Experimental and computed  $J$  and  $D$  values of complex **1**. All the values are reported here in  $\text{cm}^{-1}$ .

| Parameters | Fitted using MAGPACK package | Calculated        |
|------------|------------------------------|-------------------|
| $D_w$      | -2.23                        | -3.26 (ab initio) |
| $D_b$      | -2.09                        | -3.19 (ab initio) |
| $J_{wb1}$  | -10.5                        | -7.6 (BS-DFT)     |
| $J_{wb2}$  | -6.9                         | -7.6 (BS-DFT)     |
| $J_{bb}$   | -26.6                        | -28.0 (BS-DFT)    |

**Table S16.** CASSCF computed 5 quintets (red) and 35 triplets (blue) states along with spin-orbit states for **1'** and **1''**. All the values are reported here in  $\text{cm}^{-1}$ 

| Monomers         |                   |         |         |                  |                   |         |         |
|------------------|-------------------|---------|---------|------------------|-------------------|---------|---------|
| <b>1'</b>        |                   |         |         | <b>1''</b>       |                   |         |         |
| Spin Free States | Spin-Orbit States |         |         | Spin Free States | Spin-Orbit States |         |         |
| <b>0.0</b>       | 0.0               | 26683.9 | 40953.6 | <b>0.0</b>       | 0.0               | 26741.9 | 42143.9 |
| <b>11972.4</b>   | 0.1               | 26684.2 | 43181.0 | <b>13636.1</b>   | 0.0               | 26751.8 | 42741.9 |
| <b>18814.1</b>   | 9.1               | 26695.4 | 43203.7 | <b>18088.2</b>   | 9.6               | 26871.1 | 42826.4 |
| <b>20717.8</b>   | 10.6              | 26711.2 | 43231.0 | <b>19715.0</b>   | 9.6               | 26876.4 | 42837.0 |
| <b>21240.6</b>   | 13.2              | 26716.6 | 43835.9 | <b>20740.4</b>   | 12.8              | 26879.9 | 43242.2 |
| <b>16352.8</b>   | 11946.8           | 29678.3 | 43851.3 | <b>18581.5</b>   | 13607.2           | 29952.4 | 43256.4 |
| <b>16924.7</b>   | 11951.1           | 29679.6 | 43858.2 | <b>19244.5</b>   | 13612.6           | 29955.1 | 43271.3 |
| <b>17999.9</b>   | 11956.7           | 29681.4 | 47148.9 | <b>20224.5</b>   | 13617.0           | 29957.9 | 45656.8 |
| <b>23113.6</b>   | 11973.6           | 31968.4 | 47153.8 | <b>23280.5</b>   | 13636.6           | 32511.8 | 45684.5 |
| <b>25386.8</b>   | 11974.0           | 31977.5 | 47177.2 | <b>26016.9</b>   | 13636.8           | 32533.5 | 45686.0 |
| <b>25944.1</b>   | 16336.0           | 32008.6 | 47700.0 | <b>26326.1</b>   | 18072.9           | 32534.2 | 46624.5 |
| <b>26644.4</b>   | 16345.3           | 32098.8 | 47739.6 | <b>26621.1</b>   | 18075.1           | 33682.5 | 46659.2 |
| <b>26663.8</b>   | 16372.5           | 32139.1 | 47774.2 | <b>26848.9</b>   | 18079.9           | 33707.7 | 46743.4 |
| <b>29652.7</b>   | 16937.9           | 32146.2 | 48027.4 | <b>29933.0</b>   | 18090.1           | 33739.4 | 46837.1 |
| <b>31984.0</b>   | 16977.4           | 33489.5 | 48098.2 | <b>32515.4</b>   | 18090.5           | 33764.6 | 46888.6 |
| <b>32066.1</b>   | 16983.4           | 33498.1 | 48129.6 | <b>33691.5</b>   | 18575.2           | 33811.1 | 46946.2 |
| <b>33461.3</b>   | 18033.2           | 33502.0 | 48566.2 | <b>33733.1</b>   | 18582.7           | 33812.5 | 48321.0 |
| <b>35277.1</b>   | 18038.1           | 35264.2 | 48613.8 | <b>35315.4</b>   | 18601.4           | 35332.9 | 48331.6 |
| <b>36275.6</b>   | 18043.0           | 35276.5 | 48618.6 | <b>36118.2</b>   | 19259.3           | 35339.3 | 48338.4 |
| <b>37490.3</b>   | 18800.4           | 35288.8 | 48815.2 | <b>37026.8</b>   | 19287.2           | 35347.2 | 48960.5 |
| <b>38676.9</b>   | 18803.5           | 36289.5 | 48816.6 | <b>39388.4</b>   | 19291.7           | 36126.5 | 48966.7 |
| <b>39973.6</b>   | 18807.0           | 36305.3 | 48818.8 | <b>39925.9</b>   | 19696.1           | 36138.9 | 48966.8 |
| <b>40081.1</b>   | 18819.2           | 36317.2 | 50349.8 | <b>40046.7</b>   | 19696.9           | 36145.0 | 49724.9 |
| <b>40301.8</b>   | 18819.5           | 37506.7 | 50372.9 | <b>40439.3</b>   | 19719.2           | 37041.6 | 49725.0 |
| <b>40544.9</b>   | 20674.4           | 37519.8 | 50391.5 | <b>40581.1</b>   | 19728.3           | 37047.4 | 49727.0 |
| <b>40862.1</b>   | 20674.7           | 37522.1 | 50627.0 | <b>42125.7</b>   | 19733.4           | 37056.7 | 50807.6 |
| <b>43179.4</b>   | 20709.8           | 38683.3 | 50629.0 | <b>42747.8</b>   | 20255.0           | 39391.1 | 50808.1 |
| <b>43790.3</b>   | 20717.3           | 38707.0 | 50634.2 | <b>43175.0</b>   | 20255.5           | 39402.8 | 50859.6 |
| <b>47157.2</b>   | 20728.1           | 38707.5 | 50835.1 | <b>45686.2</b>   | 20256.3           | 39404.3 | 51033.3 |
| <b>47738.9</b>   | 21247.9           | 39952.1 | 50876.7 | <b>46681.9</b>   | 20753.3           | 39842.2 | 51060.6 |

|         |         |         |         |         |         |         |         |
|---------|---------|---------|---------|---------|---------|---------|---------|
| 48050.0 | 21259.1 | 39956.7 | 50900.8 | 46793.5 | 20755.6 | 39851.1 | 51104.6 |
| 48528.0 | 21264.5 | 39990.3 | 51367.3 | 48280.9 | 20767.6 | 39900.8 | 51403.2 |
| 48779.0 | 21299.0 | 40039.5 | 51373.6 | 48932.9 | 20780.4 | 40058.4 | 51405.6 |
| 50394.3 | 21299.2 | 40055.4 | 51376.3 | 49692.9 | 20782.0 | 40126.4 | 51448.8 |
| 50594.5 | 23134.0 | 40125.4 | 51411.4 | 50832.1 | 23299.3 | 40133.5 | 51632.3 |
| 50800.7 | 23134.9 | 40312.5 | 51452.9 | 51057.9 | 23299.4 | 40411.3 | 51638.3 |
| 51334.4 | 23142.3 | 40326.7 | 51454.4 | 51400.2 | 23307.8 | 40450.3 | 51699.6 |
| 51377.7 | 25330.8 | 40364.3 | 54259.2 | 51545.7 | 25850.8 | 40517.0 | 53479.9 |
| 54216.8 | 25356.7 | 40604.5 | 54265.6 | 53435.5 | 25928.7 | 40651.2 | 53486.2 |
| 54814.0 | 25400.3 | 40643.0 | 54266.3 | 53809.8 | 25971.4 | 40686.5 | 53492.6 |
|         | 25963.6 | 40666.3 | 54861.1 |         | 26320.0 | 40740.1 | 53851.5 |
|         | 26061.6 | 40917.2 | 54862.7 |         | 26481.4 | 42093.4 | 53857.9 |
|         | 26070.0 | 40920.3 | 54865.4 |         | 26482.6 | 42130.5 | 53863.8 |
|         | 26679.5 |         |         |         | 26684.2 |         |         |

## 9. Synthesis:

Synthesis of complex  $[\text{Mn}_{10}(\text{L}^4)_8(\text{OL}^4)_2(\text{DMF})_4(\text{MeOH})_4(\text{H}_2\text{O})_2]$  (**4**) was prepared by utilizing thiophene-2-carbonyl salicyl hydrazide ( $\text{H}_3\text{L}$ ), which was made using salicylhydrazide and thiophene carbonyl chloride as given below.

### Preparation of N-thiophenoylsalicylhydrazide ( $\text{H}_3\text{L}^4$ ):

To prepare salicylhydrazide initially, 2.5 g of salicylic acid was taken in the mixture of 50 mL MeOH to which 4 mL Conc. HCl was added and refluxed for 24 h to get methylsalicylate. Then excess acid was neutralized by sodium bicarbonate solution and extracted in  $\text{CHCl}_3$  and then solvent was removed under reduced pressure to get 2.0 g oily product. A mixture of (2.0 g; 13.15 mmol) methyl salicylate and corresponding hydrazine (1.25 equivalent, 16.437 mmol; 821 mg) was taken in 10 mL of EtOH and refluxed for 12 h to get white solid product. The product was isolated and recrystallized from hot ethanol.  $^1\text{H}$  NMR (400 MHz,  $\text{DMSO-d}_6$ ,  $\delta$  ppm): 12.5, 10.02, (s, s; 2H, amide and phenolic OH), 8.13 (dd, 1H, phenyl proton), 7.35 (q, 1H, phenyl proton), 6.84 (p, 2H, phenyl proton), 4.52 (s, 2H, ring proton).

1.0 g of thiophene-2-carboxylic acid was dissolved in 5 mL of thionyl chloride and stirred for 1.5 h. After that, it was refluxed for 4 h and then the excess thionyl chloride was removed under

## Supporting Information

reduced pressure to obtain thiophene-2-carbonyl chloride (667 mg; 4.552 mmol). The thiophene-2-carbonyl chloride was dissolved in 15 mL of  $\text{CHCl}_3$ , to which triethyl amine (0.637 mL; 4.552 mmol) was added at 0 °C and stirred for 5 minutes. Five minutes later, freshly prepared solid salicylhydrazide (4.552 mmol; 692 mg) was added slowly, followed by stirring at room temperature for one hour to get a white suspension which was further refluxed for 30 min. The product was isolated as a white solid upon cooling the mixture in the refrigerator. The amount of the product obtained was 480 mg.  $^1\text{H}$  NMR (400 MHz,  $\text{CDCl}_3$ -d, ppm,  $\delta$ ): 11.45, 10.107, 10.02 (s, s, s; 3H, amides and phenolic OH), 7.403 (dd, 2H, aromatic ring proton), 7.05 (s, 1H, ring proton), 6.83 (dd, 1H, ring proton), 6.574 (s, 1H, ring proton) and 6.38 (dd, 2H, ring proton). IR (KBr,  $\text{cm}^{-1}$ ): 3202 (m), 3010(m), 2855(w), 1633(s), 1594(s), 1535(s), 1492(s), 1418(m), 1348(m), 1301(s), 1248(m), 1237(m), 1205(m), 1158(m), 1130(w), 1089(w), 1035(m), 940(w), 902(w), 844(m), 823(m), 748(s), 712(s), 664(m), 584(m), 536(s), 451(m).

Mass: TOF ES+ 261.0532 corresponding to mono deprotonated  $\text{H}_3\text{L}^4$  species after a loss of H-atom.

## Discussion:

The crystal structure of  $[\text{Mn}_{10}(\text{L}^4)_8(\text{OL}^4)_2(\text{DMF})_4(\text{MeOH})_4(\text{H}_2\text{O})_2]$  (**4**) reveals that two  $\text{H}_3\text{L}^4$  ligands were oxidized (sulfoxidation) at the S-center of thiophene ring to produce corresponding thiophene-S-oxide ( $\text{H}_3\text{L}^4\text{O}$ ) (Scheme S1). The  $\text{Mn}^{\text{II}}$  salt was reacted with  $\text{H}_3\text{L}^4$  in a mixture of DMF and MeOH in an open atmosphere and in the presence of the ligand  $\text{Mn}^{\text{II}}$  is oxidized to  $\text{Mn}^{\text{III}}$  to form  $\text{Mn}^{\text{III}}_{10}$  (**4**) complex. The IR absorption peaks corresponding to S=O observed at 1000-1100  $\text{cm}^{-1}$ ; however, the region is also common for N-N single bond. Since ligand contains N-N single bond, thus it [1089(w), 1035(m) in  $\text{H}_3\text{L}^4$  and 1089(w), 1032(m) in **4**] is not possible to assign unambiguously. The crystal structure shows thiophene S=O bond and because of which, thiophene ring lost its planarity, with the sulfur atom puckered

up from the plane of the four-ring carbon atoms, which has also been observed in  $[\text{Cp}^*\text{Rh}(\text{TMTO})]$  compound. The famous Jacobsen's catalyst contains one  $\text{Mn}^{\text{III}}$  which was used for enantioselective epoxidation of olefins. Thus  $\{\text{Mn}^{\text{III}}(\text{L})\}$  moiety plausibly responsible for sulfoxidation leading to  $\text{H}_3\text{L}^4$  to  $\text{H}_3\text{L}^4\text{O}$ . Thiophenes are completely unreactive towards oxygen in laboratory conditions. Thiophene is resistant to sulfoxidation since this will lead to distortion in the thiophene aromatic ring and partially hamper the aromaticity in thiophene-S-oxide. In the literature, several procedures were developed for converting thiophene into thiophene-S-oxide. The most commonly used reagents are either metachloroperbenzoic acid (mCPBA) or hydrogenperoxide ( $\text{H}_2\text{O}_2$ ) and because of the above reason, the yield is low. In the literature  $\text{MnO}_2$  was used for this purpose. There is one report where  $\text{Mn}^{\text{III}}$  complex was used to oxidize non aromatic S-atom of diphenyl sulfide. However, recently oxidation of dialkyl sulfides to sulfoxides were achieved by catalytic amount TEMPO organic ligand in the presence of  $\text{Co}(\text{NO}_3)_2$  and  $\text{Mn}(\text{NO}_3)_2$  in acetic acid solution at little elevated temperature. Thus, our one is the first report to observe *in situ* sulfoxidation of 2-substituted thiophene into its corresponding thiophene-S-oxide using  $\text{Mn}^{\text{III}}$  sources.

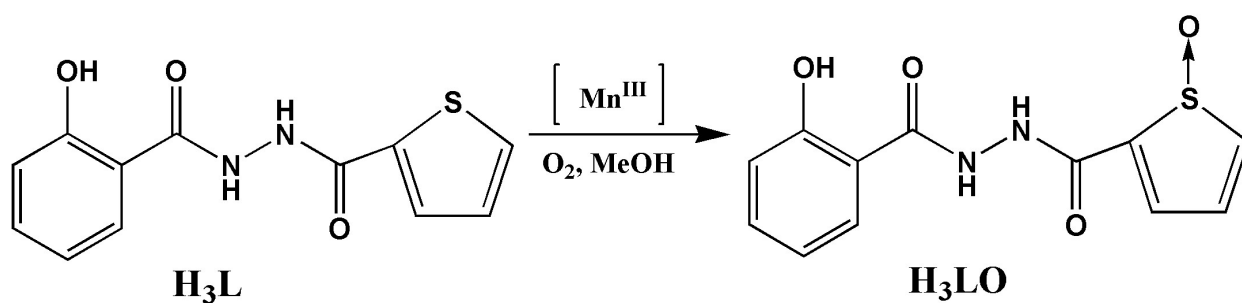

**Scheme S1.** The oxidation of N-thiophenoylsalicylhydrazide ( $\text{H}_3\text{L}^4$ ) to thiophene-S-oxide ( $\text{H}_3\text{L}^4\text{O}$ ).

#### 10. Powder XRD pattern of pyrolyzed products (manganese-oxide)

## Supporting Information

Complexes **1-4** are subjected to pyrolysis at 800 °C for 3 h continuously in open air. At the end of 3 h, the corresponding black oxides products were allowed to cool down to room temperature. Then, the obtained black powder was subjected to powder X-ray diffraction analysis at room temperature in the range corresponding to 5 to 90°. The recorded powder pattern well matches with the pure cubic phase of  $\alpha$ - $\text{Mn}_2\text{O}_3$  (JCPDS no. 41-1442) corresponding to the  $Ia3$  space group.<sup>3</sup> Therefore, a Powder X-ray diffraction study indicating all four complexes finally decomposed at very high temperatures to leave the  $\text{Mn}_2\text{O}_3$  residue finally.

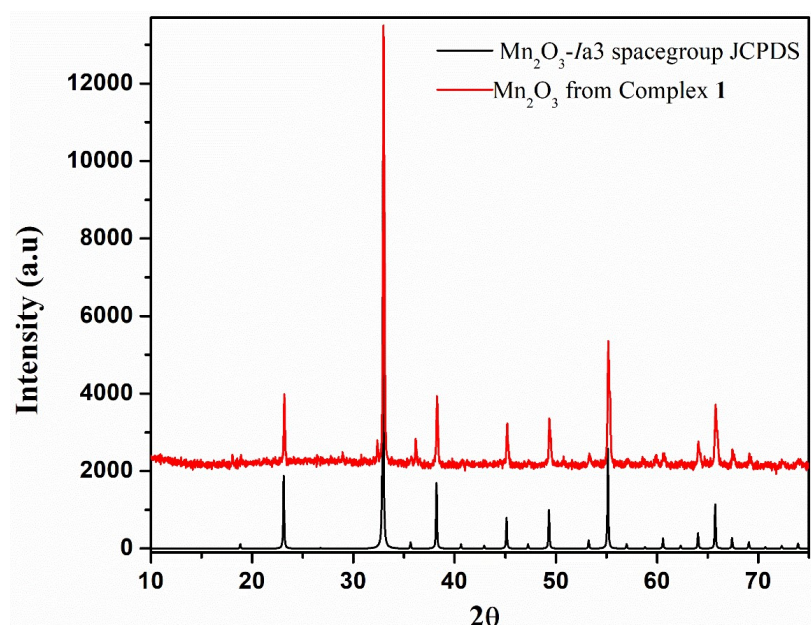

**Figure S14.** Overlay of powder pattern of  $\text{Mn}_2\text{O}_3$  obtained upon the pyrolysis on **1** in open air and JCPDS card of  $\text{Mn}_2\text{O}_3$  with  $Ia3$  space group.

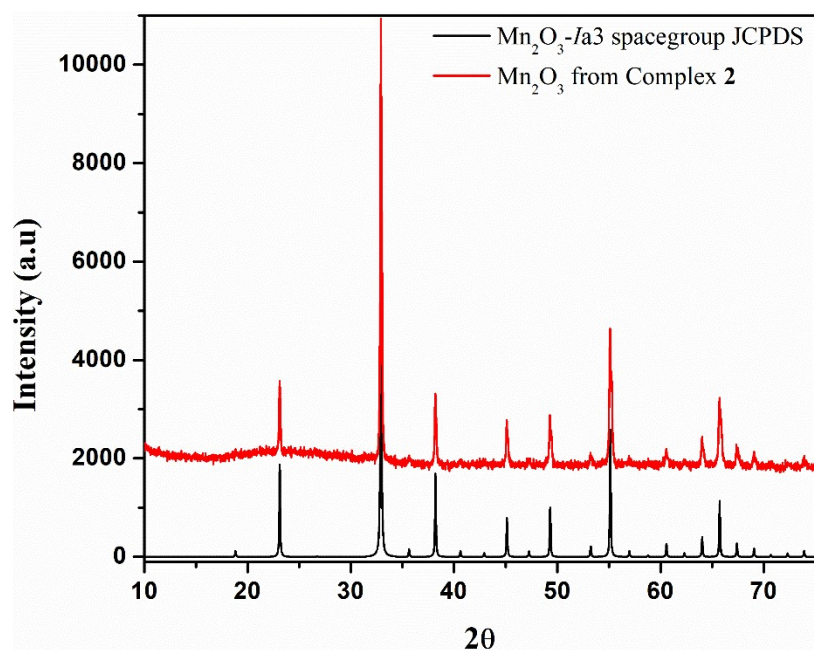

**Figure S15.** Overlay of powder pattern of Mn<sub>2</sub>O<sub>3</sub> obtained upon the pyrolysis on **2** in open air and JCPDS card of Mn<sub>2</sub>O<sub>3</sub> with *Ia3* space group.

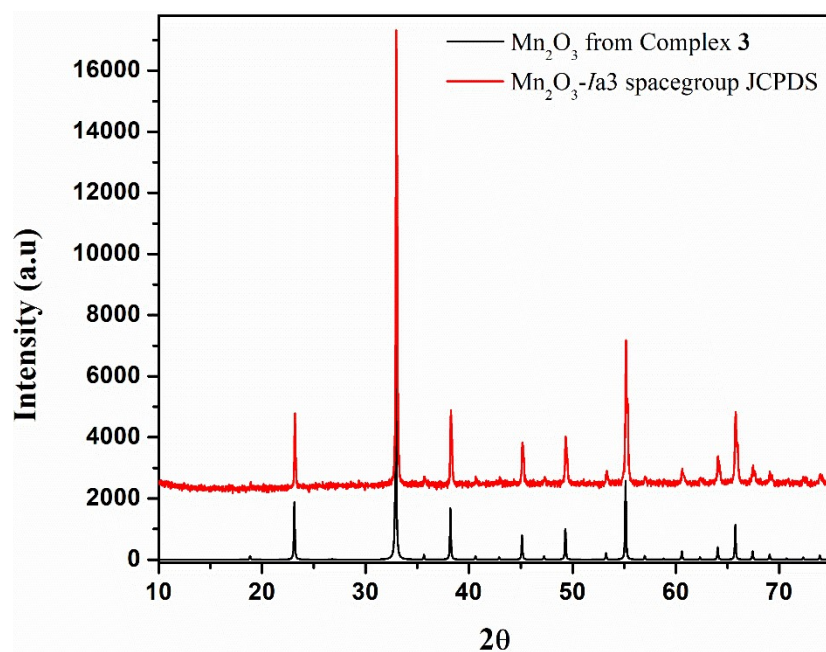

**Figure S16.** Overlay of powder pattern of Mn<sub>2</sub>O<sub>3</sub> obtained upon the pyrolysis on **3** in open air and JCPDS card of Mn<sub>2</sub>O<sub>3</sub> with *Ia3* space group.



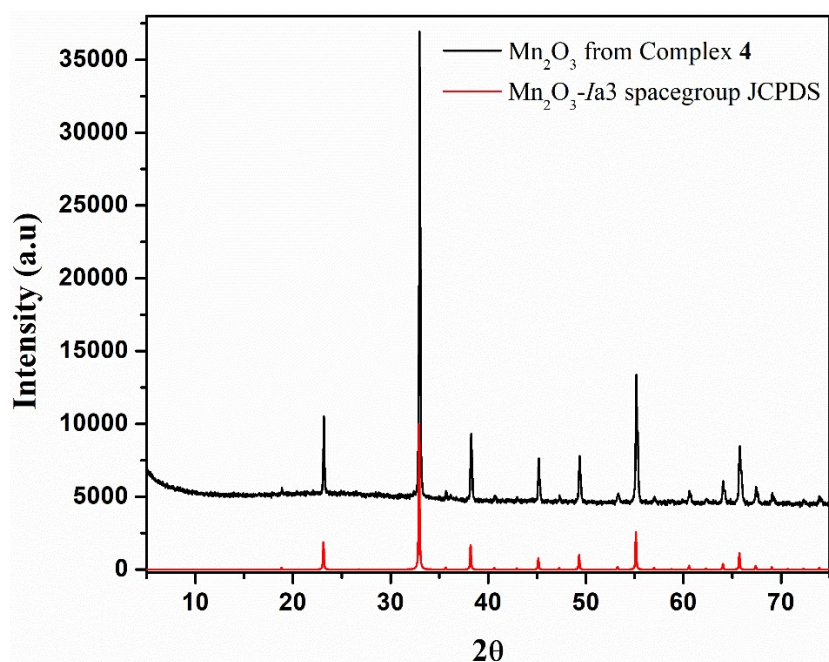

**Figure S17.** Overlay of Powder pattern of Mn<sub>2</sub>O<sub>3</sub> obtained upon the pyrolysis on **4** in open air and JCPDS card of Mn<sub>2</sub>O<sub>3</sub> with Ia3 space group.

## 11. References

1. A. Trzesowska, R. Kruszynski and T. J. Bartczak, New lanthanide–nitrogen bond-valence parameters. *Acta. Cryst.* 2005, **61**, 429-434.
2. O. C. Gagné and F. C.; Hawthorne, Comprehensive derivation of bond-valence parameters for ion pairs involving oxygen. *Acta. Cryst.* 2015, **7**, 562-578.
3. T. Z. Ren, Z.Y. Yuan, G. H. Du, and B. L. Su, in *Studies in surface science and catalysis*, Elsevier, 2006, **162**, 425-432. (doi:10.1016/s0167-2991(06)80936-5).
